# Supplementary material for: Yeast Ded1 promotes 48S translation pre-initiation complex assembly in an mRNA-specific and eIF4F-dependent manner
Source: eLife. 2018 Oct 3;7:e38892. doi: 10.7554/eLife.38892 (PMC6181565; doi:10.7554/eLife.38892)
Supplement: Figure 1—figure supplement 1—source data 1. [file elife-38892-fig1-figsupp1-data1.xlsx]

## Sheet: Sheet1
Figure 1- figure supplemental 1- Source File
Figure 1- figure supplemental 1A
	RPL41A mRNA recruited (%)
Time (min)	10X	20X	33X	20X-2min
2	8.68	4.31	5.623	69.27
5	7.63	2.568	6.298	62.26
15	10.15	3.89	4.912	67.6
30	10.83	3.91	4.12	69.21
60	11.46	2.94	3.76	70.83
120	9.76	4.12	2.845	62.1
Figure 1- figure supplemental 1B
	mRNA recruited (%)
	RPL41A		SFT2
Time (min)	-Ded1	+Ded1	-Ded1	+Ded1
2	89.27	83.23	78.602	85.53
5	87.26	85.22	77.6	92.57
15	87.6	85.01	76.598	95.89
30	89.21	82.97	76.61	89.06
60	90.83	85.87	78.345	91.16
90	87.1	85.74	82.456	88
Figure 1- figure supplemental 1D
	WT Ded1 kcat (min-1)					Ded1-∆CTD kcat (min-1)					Ded1-∆NTD kcat (min-1)
ATP (mM)	Replicate 1	Replicate 2	Average	SD		Replicate 1	Replicate 2	Average	SD		Replicate 1	Replicate 2	Average	SD
0	3.83553	2.7996	3.31757	0.732515		3.55793	0.16824	1.86309	2.39688		2.69813	7.6128	5.15547	3.47519
0.05	25.476	9.0388	17.2574	11.6229		10.2773	6.3216	8.29947	2.79713		5.4774	20.502	12.9897	10.624
0.125	36.962	33.1872	35.0746	2.66919		25.8887	14.298	20.0933	8.19584		24.0407	43.936	33.9883	14.0681
0.25	41.7167	50.096	45.9063	5.92508		44.578	30.5952	37.5866	9.88733		33.158	59.408	46.283	18.5616
0.5	64.8727	63.568	64.2203	0.922539		41.2067	52.692	46.9493	8.12136		45.2647	68.5	56.8823	16.4299
1	73.2733	74.5	73.8867	0.867384		65.9867	75.6	70.7933	6.79765		64.6827	86.712	75.6973	15.5771
2.5	82.34	77.948	80.144	3.10561		76.1933	77.316	76.7547	0.793845		70.9133	89.148	80.0307	12.8939
5	88.6733	72.732	80.7027	11.2722		85.7733	80.228	83.0007	3.92114		80.88	87.828	84.354	4.91298
Figure 1- figure supplemental 1E
	kcat (min-1)							KmATP (mM)
	No RNA	No ATP	WT Ded1	Ded1E307A	Ded1-∆CTD	Ded1-∆NTD		WT Ded1	Ded1-∆CTD	Ded1-∆NTD
Replicate 1	0.487805	0.650407	67.7507	1.57163	61.5382	53.3545		0.28	0.39	0.2
Replicate 2	3.5026	3.63073	63.8211	5.40106	70.4195	54.5756		0.19	0.41	0.39
Replicate 3	3.30585	3.61333	78.7593	7.37545	69.2569	47.9154		0.21	0.35
Replicate 4	0.19561	0.127002	66.0033		90.0488	67.0244		0.4
Replicate 5	0.0158899	0.175073	76.7439		69.7512	79.322
Replicate 6	0.777724		84.5772		59.5935
Replicate 7	2.0612		69.9065		69.7138
Replicate 8			93.5122		55.4667
Replicate 9			93.0081
Figure 1- figure supplemental 1F
	Fluorescence anisotropy measurements
	No nucleotide			ADP			ADPNP
Ded1 (nM)	Replicate 1	Replicate 2		Replicate 1	Replicate 2		Replicate 1	Replicate 2
0	-0.00654	0.02535		0.021	0.02375		0.01885	0.0234
12.5	0.01829	0.04985		0.04455	0.03975		0.04125	0.0521
25	0.04715	0.0614		0.0605	0.04735		0.07105	0.08165
50	0.10317	0.085867		0.0994	0.0746		0.11375	0.1239
100	0.18936	0.12155		0.15215	0.11885		0.1673	0.15325
250	0.25231	0.16655		0.2253	0.17755		0.16655	0.1865
500	0.27615	0.19613		0.24747	0.21655			0.1982
750		0.1875		0.2573	0.2247
Figure 1- figure supplemental 1H
	RPL41A - Rates (min-1)						HOR7 - Rates (min-1)
Ded1 (nM)	Replicate 1	Replicate 2	Replicate 3	Average	SD		Replicate 1	Replicate 2	Replicate 3	Average	SD
0	0.8529	1.0458	1.0458	0.9815	0.111371		1.1859	1.4749	1.2103	1.29037	0.160276
10	0.92904	1.2776	1.3002	1.16895	0.208072		1.3695			1.3695
25	1.2123	1.5621	1.4006	1.39167	0.175071		1.5323	1.6141		1.5732	0.0578413
50	1.6208	1.879	1.7953	1.76503	0.131734		1.6326	1.787	1.4	1.60653	0.194812
100	1.7994	2.6822	2.3713	2.2843	0.447784		1.9311	2.2281	1.881	2.0134	0.187615
250	1.9947	2.4882	2.4234	2.3021	0.268181		2.5152	2.634	2.2125	2.4539	0.217333
500	2.1884			2.1884			2.7239	2.828	2.0328	2.52823	0.432203
750	2.2791			2.2791			2.8982	2.8782	2.1754	2.6506	0.411657
1000							2.6562	2.8106	2.3316	2.59947	0.244488
	SFT2 - Rates (min-1)						PMA1 - Rates (min-1)						OST3 - Rates (min-1)						FET3 - Rates (min-1)
Ded1 (nM)	Replicate 1	Replicate 2	Replicate 3	Average	SD		Replicate 1	Replicate 2	Replicate 3	Average	SD		Replicate 1	Replicate 2	Replicate 3	Average	SD		Replicate 1	Replicate 2	Replicate 3	Average	SD
0	0.39028	0.48381	0.44906	0.44105	0.0472767		0.28956	0.31445	0.39601	0.33334	0.0556824		0.18465	0.16164	0.1273	0.157863	0.0288609		0.049536	0.046242	0.045189	0.046989	0.00226773
25	0.59991	0.79903	0.80736	0.735433	0.117441		0.41218			0.41218									0.089877	0.070283		0.08008	0.0138551
50	0.68543	0.87736	0.9589	0.840563	0.140399		0.66473	0.50252	0.81411	0.660453	0.155839		0.36594	0.23155	0.27514	0.290877	0.0685631		0.098806	0.10154	0.069152	0.0898327	0.0179621
100	0.82582	1.1849	1.4328	1.14784	0.305182		1.2312	1.1909	1.3303	1.2508	0.0717371		0.40094	0.60502	0.50829	0.50475	0.102086		0.12395	0.18056	0.16716	0.157223	0.0295842
250	2.1267	2.0348	2.0777	2.07973	0.0459837		1.7127	1.5859	1.7324	1.677	0.0795074		1.0558	0.98076	0.98319	1.00658	0.0426402		0.26651	0.28885	0.21628	0.257213	0.0371675
500	2.4461	2.7918	2.4623	2.56673	0.195082		2.3633	2.5343	2.7034	2.53367	0.170051		1.1209	1.5067	1.2418	1.2898	0.197328		0.36793	0.41682	0.39393	0.392893	0.0244615
750	2.8912	2.9522	2.8185	2.8873	0.0669353		2.5219	2.4548		2.48835	0.0474469		1.3423	1.3995	1.3306	1.35747	0.036869		0.37235	0.4433	0.43256	0.41607	0.0382415
1000		2.728		2.728			2.6968	2.6449	2.7901	2.7106	0.0735771		1.61	1.7022	1.5365	1.61623	0.0830257			0.48577	0.38339	0.43458	0.0723936
1150	2.5322			2.5322
Figure 1- figure supplemental 1I
	Rates -Ded1 (min-1)				+Ded1 (min-1)				Ded1E307A (min-1)
	Replicate 1	Replicate 2	Replicate 3		Replicate 1	Replicate 2	Replicate 3		Replicate 1	Replicate 2	Replicate 3
RPL41A	0.8529	0.95259	1.0458		2.36105	2.98996	2.9057		1.0134	1.1505
HOR7	1.1859	1.4749	1.2103		3.0513	3.1019	2.3746		1.03772	0.9534
SFT2	0.39028	0.48381	0.44906		3.39211	3.62519	3.4397		0.12703	0.25919	0.14148
PMA1	0.28956	0.31445	0.39601		3.32362	3.41403	3.56588		0.30238	0.4638
OST3	0.18465	0.16164	0.1273		1.87323	2.20422	1.95518		0.49655	0.25089
Figure 1- figure supplemental 1J
	RPL41A - Rates (min-1) WT-Ded1 only						RPL41A - Rates (min-1) WT-Ded1 + Ded1E307A (500 nM)							RPL41A - Rates (min-1) Ded1E307A
WT-Ded1 (nM)	Replicate 1	Replicate 2	Replicate 3	Average	SD		Replicate 1	Replicate 2	Replicate 3	Average	SD		Ded1E307A (nM)	Replicate 1	Replicate 2	Replicate 3	Average	SD
0	1.1488	0.75827	0.8529	0.91999	0.203726		0.84388	0.78005	0.91644	0.84679	0.0682415		0	0.77627	0.80942	0.85593	0.813873	0.0400163
10	1.1597	0.91949	0.92904	1.00274	0.136012		0.80196	0.87939		0.840675	0.0547513		10		0.8122	1.3171	1.06465	0.357018
25	1.4805	1.0621	1.2123	1.25163	0.211955		1.051	1.0396	1.205	1.09853	0.0923789		25		1.1789	1.0934	1.13615	0.0604576
50	1.7705	1.5909	1.6208	1.66073	0.0962291		1.0781	1.3223	1.2404	1.2136	0.124286		50	1.1513	1.0078	1.1421	1.1004	0.0803258
100	1.7086	2.3767	1.7994	1.96157	0.362371		1.4929	1.6824	1.4505	1.54193	0.123481		100	1.0856	0.99809	1.1814	1.08836	0.0916862
250	1.9939	2.5894	1.9947	2.19267	0.343581		1.9376	1.8484	1.9975	1.92783	0.0750283		250	1.0842	0.85838	0.80046	0.914347	0.149921
500	2.1569	2.6289	2.1884	2.32473	0.263886		2.2713	2.6088	2.2986	2.3929	0.187472		500	1.0134	1.1505	0.86171	1.00854	0.144456
