# Supplementary material for: Yeast Ded1 promotes 48S translation pre-initiation complex assembly in an mRNA-specific and eIF4F-dependent manner
Source: eLife. 2018 Oct 3;7:e38892. doi: 10.7554/eLife.38892 (PMC6181565; doi:10.7554/eLife.38892)
Supplement: Figure 1—source data 1. [file elife-38892-fig1-data1.xlsx]

## Sheet: Sheet1
Figure 1- Source File
Figure 1B
	Rates -Ded1 (min-1)				Rates +Ded1 (min-1)				Fold-change in rates (+/-Ded1)
	Replicate 1	Replicate 2	Replicate 3		Replicate 1	Replicate 2	Replicate 3		Replicate 1	Replicate 2	Replicate 3
RPL41A	0.8529	0.95259	1.0458		2.36105	2.98996	2.9057		2.76826	3.13877	2.77845
HOR7	1.1859	1.4749	1.2103		3.0513	3.1019	2.3746		2.57298	2.10313	1.96199
SFT2	0.39028	0.48381	0.44906		3.39211	3.62519	3.4397		8.69148	7.493	7.65978
PMA1	0.28956	0.31445	0.39601		3.32362	3.41403	3.56588		11.4782	10.8571	9.00452
OST3	0.18465	0.16164	0.1273		1.87323	2.20422	1.95518		10.1448	13.6366	15.3588
FET3	0.049536	0.046242	0.045189		0.567891	0.638461	0.568383		11.4642	13.807	12.5779
Figure 1C
	K1/2Ded1 (nM)
	Replicate 1	Replicate 2	Replicate 3
RPL41A	58.705	49.349	64.725
HOR7	129.1	120.4	97.067
SFT2	239.88	251.34	216.9
PMA1	248.11	283.04	265.73
OST3	330.72	337.7	316.8
FET3	377.28	331.99	345.51
Figure 1D
	Endpoints -Ded1 (%)				Endpoints +Ded1 (%)
	Replicate 1	Replicate 2	Replicate 3		Replicate 1	Replicate 2	Replicate 3
RPL41A	94.81	95.59	92.65		94.07	94.97	95.55
HOR7	93.67	93.33	94.93		94.31	94.26	94.81
SFT2	78.79	72.25	85.66		93.97	92.48	93.95
PMA1	27.52	26.56	36.45		93.18	91.62	88.43
OST3	40.607	45.445	37.412		86.048	89.047	83.481
FET3	79.63	80.66	72		89.8	91.28	79.14
