# Supplementary material for: Yeast Ded1 promotes 48S translation pre-initiation complex assembly in an mRNA-specific and eIF4F-dependent manner
Source: eLife. 2018 Oct 3;7:e38892. doi: 10.7554/eLife.38892 (PMC6181565; doi:10.7554/eLife.38892)
Supplement: Figure 2—figure supplement 1—source data 1. [file elife-38892-fig2-figsupp1-data1.xlsx]

## Sheet: Sheet1
Figure 2- figure supplemental 1- Source File
Figure 2- figure supplemental 1C
	SFT2 - Rates (min-1)						SFT2-M - Rates (min-1)						PMA1 - Rates (min-1)						PMA1-M - Rates (min-1)
Ded1 (nM)	Replicate 1	Replicate 2	Replicate 3	Average	SD		Replicate 1	Replicate 2	Replicate 3	Average	SD		Replicate 1	Replicate 2	Replicate 3	Average	SD		Replicate 1	Replicate 2	Replicate 3	Average	SD
0	0.39028	0.48381	0.44906	0.44105	0.0472767		0.84539	0.82745	0.97004	0.88096	0.0776653		0.28956	0.31445	0.39601	0.33334	0.0556824		1.3514	1.2178	1.1143	1.22783	0.118868
10																				1.45	1.2742	1.3621	0.124309
25	0.59991	0.79903	0.80736	0.735433	0.117441		1.2779	1.1931	1.0097	1.16023	0.137087		0.41218			0.41218			2.3383	1.9299	1.6737	1.98063	0.335192
50	0.68543	0.87736	0.9589	0.840563	0.140399		1.2809	1.5924	1.4433	1.43887	0.155797		0.66473	0.50252	0.81411	0.660453	0.155839		2.5384	2.3365	2.4776	2.45083	0.103577
100	0.82582	1.1849	1.4328	1.14784	0.305182		2.1615	1.9556	1.926	2.01437	0.128278		1.2312	1.1909	1.3303	1.2508	0.0717371		3.2881	3.1182	2.776	3.06077	0.260836
250	2.1267	2.0348	2.0777	2.07973	0.0459837		2.6803	2.5016	2.5683	2.5834	0.0903019		1.7127	1.5859	1.7324	1.677	0.0795074		3.5156	3.3569	2.8067	3.2264	0.372032
500	2.4461	2.7918	2.4623	2.56673	0.195082		2.7919	3.0854	2.9634	2.9469	0.147444		2.3633	2.5343	2.7034	2.53367	0.170051		3.4686	3.2673	2.8979	3.21127	0.289447
750	2.8912	2.9522	2.8185	2.8873	0.0669353		3.3811	2.9306	2.879	3.06357	0.2762		2.5219	2.4548		2.48835	0.0474469
1000		2.728		2.728			2.9206			2.9206			2.6968	2.6449	2.7901	2.7106	0.0735771
1150	2.5322			2.5322
Figure 2- figure supplemental 1D
	WT SFT2 (% mRNA)				SFT2-M2 (% mRNA)
Ded1 (nM)	Replicate 1	Replicate 2	Replicate 3		Replicate 1	Replicate 2	Replicate 3
0	78.79	72.25	85.66		0	0	0
100	92.89	90.53	92.89		2.77	2.48	2.26
250	91.43	87.92	92.61		6.84	7.45	7.29
500	94.79	93.59	92.4		14.2	11.73	11.24
1000	93.97	92.48	93.95		25.68	19.27	22.52
Figure 2- figure supplemental 1E
	mRNA recruited (%)
	-SL		CD-8.1		CP-8.1
Time (min)	-Ded1	+Ded1	-Ded1	+Ded1	-Ded1	+Ded1
0.25	87.17	95.52	74	79.531	82.44	89
2	86.33	94.6	74.36	78.1	88.45	87.41
8	86.81	95.77	75.05	77.02	84.49	86.55
20	87.59	95.44	67.65	76.14	78.29	84.54
40	89.21	92.73	58.73	66.36	79.37	79.58
Figure 2- figure supplemental 1F
	-SL - Rates (min-1)						CP-8.1 - Rates (min-1)						CD-8.1 - Rates (min-1)
Ded1 (nM)	Replicate 1	Replicate 2	Replicate 3	Average	SD		Replicate 1	Replicate 2	Replicate 3	Average	SD		Replicate 1	Replicate 2	Replicate 3	Average	SD
0	1.933	1.7071	2.0758	1.9053	0.185904		0.18582	0.2827	0.27117	0.246563	0.0529202		0.093177	0.12173	0.12689	0.113932	0.0181589
10		2.1258	3.0563	2.59105	0.657963
25	3.4011	3.8139	3.9969	3.7373	0.305197								0.29693			0.29693
50	5.1577	4.616	5.0192	4.93097	0.281422		0.32374	0.49509	0.47316	0.430663	0.0932453		0.35744	0.36456	0.36916	0.36372	0.00590498
75		5.5389		5.5389
100	5.405	5.7144	6.4269	5.84877	0.524033		0.5155	0.62649	0.62066	0.58755	0.0624652		0.46536	0.50171	0.5099	0.492323	0.0237073
250	5.5562	4.9737	6.2254	5.5851	0.62635		0.58195	0.93456	0.70022	0.73891	0.179461		0.79577	0.78475	0.69279	0.75777	0.0565434
500	6.9172	5.6943	6.3395	6.317	0.61176		0.64918	1.1023	0.98277	0.911417	0.234836		1.2194	0.96753	1.0334	1.07344	0.130622
750	6.4999			6.4999			0.8664		1.0593	0.96285	0.136401		1.3798	1.3727		1.37625	0.00502046
1000	5.5549			5.5549			1.0219	1.4013	1.077	1.16673	0.205		1.4205	1.3445	1.273	1.346	0.0737614
1300							0.83485	1.1619		0.998375	0.231259			1.4732	1.37	1.4216	0.0729734
Figure 2- figure supplemental 1G
	Rates -Ded1 (min-1)				+Ded1 (min-1)				Ded1E307A (min-1)
	Replicate 1	Replicate 2	Replicate 3		Replicate 1	Replicate 2	Replicate 3		Replicate 1	Replicate 2	Replicate 3
-SL	1.933	1.7071	2.0758		6.4476	6.0789	6.8669		2.8943	2.4222	3.3885
CP-8.1	0.18582	0.2827	0.27117		1.07389	1.45772	1.29953		0.30213	0.20438	0.22477
CD-8.1	0.093177	0.12173	0.12689		2.01949	1.94878	1.75307		0.06546	0.09697	0.07495
