# Supplementary material for: Yeast Ded1 promotes 48S translation pre-initiation complex assembly in an mRNA-specific and eIF4F-dependent manner
Source: eLife. 2018 Oct 3;7:e38892. doi: 10.7554/eLife.38892 (PMC6181565; doi:10.7554/eLife.38892)
Supplement: Figure 2—source data 1. [file elife-38892-fig2-data1.xlsx]

## Sheet: Sheet1
Figure 2- Source File
Figure 2B
	Endpoints -Ded1 (%)				Endpoints +Ded1 (%)
	Replicate 1	Replicate 2	Replicate 3		Replicate 1	Replicate 2	Replicate 3
PMA1-M	64.83	60	60.99		88.94	85.32	96.86
PMA1	27.52	26.56	36.45		93.18	91.62	88.43
SFT2-M	92.88	93.67	86.89		93.1	95.966	93.98
SFT2	78.79	72.25	85.66		93.97	92.48	93.95
-SL	78.44	89.75	86.21		95.5	95.43	98.06
CP-8.1	94.63	96.27	79.81		96.48	97.05	97.83
CD-8.1	80.54	76.99	82.15		89.48	93	93.78
Figure 2C
	Rates -Ded1 (min-1)				Rates +Ded1 (min-1)				Fold-change in rates (+/-Ded1)
	Replicate 1	Replicate 2	Replicate 3		Replicate 1	Replicate 2	Replicate 3		Replicate 1	Replicate 2	Replicate 3
PMA1-M	1.3514	1.2178	1.1143		3.7532	3.6471	3.14529		2.77727	2.99483	2.82266
PMA1	0.28956	0.31445	0.39601		3.32362	3.41403	3.56588		11.4782	10.8571	9.00452
SFT2-M	0.84539	0.82745	0.97004		3.44487	3.43367	3.36454		4.07489	4.1497	3.46845
SFT2	0.39028	0.48381	0.44906		3.39211	3.62519	3.4397		8.69148	7.493	7.65978
-SL	1.933	1.7071	2.0758		6.4476	6.0789	6.8669		3.33554	3.56095	3.30807
CP-8.1	0.18582	0.2827	0.27117		1.07389	1.45772	1.29953		5.77919	5.15642	4.79231
CD-8.1	0.093177	0.12173	0.12689		2.01949	1.94878	1.75307		21.6737	16.009	13.8157
Figure 2D
	K1/2Ded1 (nM)
	Replicate 1	Replicate 2	Replicate 3
PMA1-M	37.292	46.311	35.61
PMA1	248.11	283.04	265.73
SFT2-M	119.93	126.14	112.14
SFT2	239.88	251.34	216.9
-SL	31.671	37.174	29.228
CP-8.1	285.11	207.16	262.34
CD-8.1	413.73	470.23	426.52
Figure 2F
	Rates -Ded1 (min-1)				Rates +Ded1 (min-1)
	Replicate 1	Replicate 2	Replicate 3		Replicate 1	Replicate 2	Replicate 3
-SL	1.933	1.7071	2.0758		6.4476	6.0789	6.8669
CD-10.5	0.072088	0.080587	0.089935		0.14698	0.16118	0.15799
CD-8.1	0.093177	0.12173	0.12689		2.01949	1.94878	1.75307
CD-3.7	0.088052	0.065637	0.11104		2.65634	2.69616	2.51089
