# Supplementary material for: Yeast Ded1 promotes 48S translation pre-initiation complex assembly in an mRNA-specific and eIF4F-dependent manner
Source: eLife. 2018 Oct 3;7:e38892. doi: 10.7554/eLife.38892 (PMC6181565; doi:10.7554/eLife.38892)
Supplement: Figure 3—figure supplement 1—source data 1. [file elife-38892-fig3-figsupp1-data1.xlsx]

## Sheet: Sheet1
Figure 3- figure supplemental 1- Source File
Figure 3- figure supplemental 1A
	RPL41A
	-eIF4A, -Ded1 (% mRNA recruited)					-eIF4A, +Ded1 (% mRNA recruited)					+eIF4A, -Ded1 (% mRNA recruited)						+eIF4A, +Ded1 (% mRNA recruited)
Time (min)	Replicate 1	Replicate 2	Average	SD		Replicate 1	Replicate 2	Average	SD		Replicate 1	Replicate 2	Replicate 3	Average	SD		Replicate 1	Replicate 2	Replicate 3	Average	SD
0.25												19.5		19.5				51.09	64.59	57.84	9.54594
0.5												25.87	42.44	34.155	11.7168		51.09	64.66	79.63	65.1267	14.2757
1												34.85	63.79	49.32	20.4637		64.59	81.28	92.97	79.6133	14.2632
2	0.47	5.47	2.97	3.53553		0.43	2.37	1.4	1.37179		81.84	51.8	72.65	68.7633	15.3925		92.43	85.69	96.7	91.6067	5.55098
5	1.04	6.04	3.54	3.53553		0.78	3.11	1.945	1.64756		92.66	67.81	90.79	83.7533	13.839		93.12	92.68	98.06	94.62	2.98724
15	0.91	3.91	2.41	2.12132		1.72	1.71	1.715	0.00707107		90.97	78.57	97.43	88.99	9.58463		93.81	94.49	96.13	94.81	1.19264
30	1.89	4.89	3.39	2.12132		3.43	5.89	4.66	1.73948		92.41	93.44	94.1	93.3167	0.851724		95.45	93.43		94.44	1.42836
60	2.16	5.16	3.66	2.12132		4.06	6.36	5.21	1.62635		90.79	91.63		91.21	0.59397		89.65	87.2		88.425	1.73241
120	2.21	7.21	4.71	3.53553		2.21	2.761	2.4855	0.389616		93.36	95.89		94.625	1.78898		93.28	95.98		94.63	1.90919
Figure 3- figure supplemental 1B
	HOR7
	-eIF4A, -Ded1 (% mRNA recruited)					-eIF4A, +Ded1 (% mRNA recruited)					+eIF4A, -Ded1 (% mRNA recruited)						+eIF4A, +Ded1 (% mRNA recruited)
Time (min)	Replicate 1	Replicate 2	Average	SD		Replicate 1	Replicate 2	Average	SD		Replicate 1	Replicate 2	Replicate 3	Average	SD		Replicate 1	Replicate 2	Replicate 3	Average	SD
0.25																	63.7	57.8	51.9	57.8	5.9
0.5																	76.16	64.84	74.73	71.91	6.16441
1											48.92	47.2	41.7	45.94	3.77131		88.26	77.92	85.9	84.0267	5.41857
2	1.65	1.61	1.63	0.0282843		12.12		12.12			76.88	75.62	74.82	75.7733	1.03852		91.38	85.99	91.42	89.5967	3.12353
5	2.09	3.98	3.035	1.33643		9.64	3.54	6.59	4.31335		80.1	89.51	86.4	85.3367	4.79427		94.17	92.37	86.36	90.9667	4.08975
15	1.96	6.26	4.11	3.04056		13.16	4.55	8.855	6.08819		93.45	90.53	90.68	91.5533	1.64427		95.76	94.77	95.05	95.1933	0.510327
30	2.98	6.5	4.74	2.48902		3.47	8.17	5.82	3.3234		92.23	94.15	93.17	93.1833	0.960069		96.81	94.71	95.93	95.8167	1.05458
60	3.82	7.01	5.415	2.25567		3.51	2.68	3.095	0.586899		94.84	96.46	93.34	94.88	1.56038
120	5.09	5.74	5.415	0.459619		3.62	3.37	3.495	0.176777		92.91	91.42	93.74	92.69	1.17554
Figure 3- figure supplemental 1C
	OST3
	-eIF4A, -Ded1 (% mRNA recruited)					-eIF4A, +Ded1 (% mRNA recruited)					+eIF4A, -Ded1 (% mRNA recruited)						+eIF4A, +Ded1 (% mRNA recruited)
Time (min)	Replicate 1	Replicate 2	Average	SD		Replicate 1	Replicate 2	Average	SD		Replicate 1	Replicate 2	Replicate 3	Average	SD		Replicate 1	Replicate 2	Replicate 3	Average	SD
0.5																	37.09	41.09	47.09	41.7567	5.03322
1																	54.22	67.22	64.22	61.8867	6.80686
2	1.21	1.43	1.32	0.155563		7.74	10.93	9.335	2.25567		11.78	15.71	21.34	16.2767	4.80513		81.38	81.89	68.75	77.34	7.44353
5	3.58	2.06	2.82	1.0748		3.62	9.69	6.655	4.29214		21.2	24.58	32.24	26.0067	5.65658		83.23	84.62	84.06	83.97	0.699357
15	4.32	3.48	3.9	0.59397		8.54	9.04	8.79	0.353553		28.51	32.13	33.87	31.5033	2.7344		85.22	86.85	87.2	86.4233	1.05671
30	5.35	3.66	4.505	1.19501		13.94	15.2	14.57	0.890955		33.96	38.13	45.03	39.04	5.59082		85.01	86.59	79.49	83.6967	3.72775
60	7.26	4.08	5.67	2.2486		7.15	6.45	6.8	0.494975		32.93	36.16	44.5	37.8633	5.97011		82.97	85.92		84.445	2.08597
120	7.74	3.97	5.855	2.66579		9.22	9.69	9.455	0.33234		37.63	40.24	42.75	40.2067	2.56016		85.87	85.21		85.54	0.46669
Figure 3- figure supplemental 1D
	SFT2
	-eIF4A, -Ded1 (% mRNA recruited)						-eIF4A, +Ded1 (% mRNA recruited)					+eIF4A, -Ded1 (% mRNA recruited)						+eIF4A, +Ded1 (% mRNA recruited)
Time (min)	Replicate 1	Replicate 2	Replicate 3	Average	SD		Replicate 1	Replicate 2	Average	SD		Replicate 1	Replicate 2	Replicate 3	Average	SD		Replicate 1	Replicate 2	Replicate 3	Average	SD
0.25																		42.9	40.4	47.9	43.7333	3.81881
0.5																		64	63.97	67.32	65.0967	1.92552
1																		71.14	80.74	76.23	76.0367	4.80292
2	1.75		4.05	2.9	1.62635							44.63	49.08	47.4	47.0367	2.24714		75.27	86.72	88.41	83.4667	7.14864
5	1.85	2.32		2.085	0.33234		2.73	4.11	3.42	0.975807		60.79	64.02	70.33	65.0467	4.85216		84.33	93.29	86.24	87.9533	4.71933
15	2.64	2.63	4.94	3.40333	1.3308		3.02	4.98	4	1.38593		72.76	77.72	79.26	76.58	3.39665		93.68	89.16	91	91.28	2.27297
30	2.81	1.46	6.19	3.48667	2.43652		2.34	4.69	3.515	1.6617		76.65	79.37	81.84	79.2867	2.596		92.56	86.59		89.575	4.22143
60	2.17	2.17	5.43	3.25667	1.88216		4.17	5.24	4.705	0.756604		78.88	82.29	78.85	80.0067	1.97748
120	2.89	2.89	5.43	3.73667	1.46647		5.11	5.8	5.455	0.487904		83.07	85.12		84.095	1.44957
Figure 3- figure supplemental 1E
	SFT2-M
	-eIF4A, -Ded1 (% mRNA recruited)					-eIF4A, +Ded1 (% mRNA recruited)					+eIF4A, -Ded1 (% mRNA recruited)						+eIF4A, +Ded1 (% mRNA recruited)
Time (min)	Replicate 1	Replicate 2	Average	SD		Replicate 1	Replicate 2	Average	SD		Replicate 1	Replicate 2	Replicate 3	Average	SD		Replicate 1	Replicate 2	Replicate 3	Average	SD
0.25																	56.87	58.68	55.88	57.1433	1.41987
0.5																	74.65	77.3	77.88	76.61	1.722
1											60.3	62.9	49.9	57.7	6.87895		86.87	88.68	95.88	90.4767	4.76613
2		4.94	4.94			7.98	3.02	5.5	3.50725		75.28	80.11	80.9	78.7633	3.04241		86.36	93.34	97.38	92.36	5.57498
5	7.5	6.19	6.845	0.92631		11.51	2.34	6.925	6.48417		86.48	89.67	87.84	87.9967	1.60076		90.75	96.15	93.36	93.42	2.7005
15	8.23	5.43	6.83	1.9799		11.07	4.17	7.62	4.87904		86.85	84.02	88.89	86.5867	2.44566		90.97	95.91	96.13	94.3367	2.91769
30	6.67	5.43	6.05	0.876812		9.14	5.11	7.125	2.84964		89.75	94.09	95.47	93.1033	2.98492		92	96.53	94.9	94.4767	2.29448
60	8.98	9.43	9.205	0.318198		6.27	5.34	5.805	0.657609		86.74	92.75	94.22	91.2367	3.96298
120	5.08	6.83	5.955	1.23744		9.85	8.89	9.37	0.678823			93.77	95.44	94.605	1.18087
Figure 3- figure supplemental 1F
	CD-8.1
	-eIF4A, -Ded1 (% mRNA recruited)						-eIF4A, +Ded1 (% mRNA recruited)					+eIF4A, -Ded1 (% mRNA recruited)						+eIF4A, +Ded1 (% mRNA recruited)
Time (min)	Replicate 1	Replicate 2	Replicate 3	Average	SD		Replicate 1	Replicate 2	Average	SD		Replicate 1	Replicate 2	Replicate 3	Average	SD		Replicate 1	Replicate 2	Replicate 3	Average	SD
0.5																		46.55	52.16	59.3	52.67	6.39028
1																		66.14	68.5	67.84	67.4933	1.21759
2	4.66			4.66			4.94	6.94	5.94	1.41421		17.2	24.06	34.86	25.3733	8.90295		73.12	70.73		71.925	1.68999
5	5.19		13.59	9.39	5.9397		6.65	8.19	7.42	1.08894		34.66	30.4	48.17	37.7433	9.27758		81.02	84.31	78.41	81.2467	2.95652
15	10.58	5.21	18	11.2633	6.42232		7.92	7.43	7.675	0.346482		57.97	51.78	60.33	56.6933	4.41566		95.85	91.93	95.06	94.28	2.07314
30		10.53	8.31	9.42	1.56978		4.24	9.43	6.835	3.66988		59.71	75.75	81.76	72.4067	11.3989		96.6	93.37	94.01	94.66	1.71029
60	7.31	11.23		9.27	2.77186		7.73	9.43	8.58	1.20208		80.69	77.94	88.46	82.3633	5.45597
120	11.95	13.42	11.22	12.1967	1.12055		9.3	11.83	10.565	1.78898		73.93	79.77	91.03	81.5767	8.69198
Figure 3- figure supplemental 1G
	CP-8.1
	-eIF4A, -Ded1 (% mRNA recruited)					-eIF4A, +Ded1 (% mRNA recruited)					+eIF4A, -Ded1 (% mRNA recruited)						+eIF4A, +Ded1 (% mRNA recruited)
Time (min)	Replicate 1	Replicate 2	Average	SD		Replicate 1	Replicate 2	Average	SD		Replicate 1	Replicate 2	Replicate 3	Average	SD		Replicate 1	Replicate 2	Replicate 3	Average	SD
0.5																	45.5	48.31	52.21	48.6733	3.36972
1											43.6	36.1	37.9	39.2	3.91535		58.66	62.82	63.27	61.5833	2.54166
2	7.95	10.72	9.335	1.95869		7.88	9.95	8.915	1.46371		56.66	57.54	62.67	58.9567	3.2458		80.57	83.24	77.38	80.3967	2.93384
5	5.54	7.27	6.405	1.22329		7.01	5.54	6.275	1.03945		65.01	65.87	80.54	70.4733	8.72859		95.29	93.18	93.89	94.12	1.07364
15	12.88	4.53	8.705	5.90434		12.45	12.88	12.665	0.304056		84.59	87.05	95.55	89.0633	5.7507		93.42	98.18	98.73	96.7767	2.91994
30		11.97	11.97			13.96		13.96			91.62	90.51	84.46	88.8633	3.85357		97.82	97.87	92.61	96.1	3.02253
60	14.28	13.38	13.83	0.636396		11.65	14.28	12.965	1.85969		92.01	95.58	95.8	94.4633	2.12749
120	14.95	15.85	15.4	0.636396		12.11	14.95	13.53	2.00818		96.61	96.91	97	96.84	0.204206
Figure 3- figure supplemental 1H
	-SL
	-eIF4A, -Ded1 (% mRNA recruited)						-eIF4A, +Ded1 (% mRNA recruited)						+eIF4A, -Ded1 (% mRNA recruited)						+eIF4A, +Ded1 (% mRNA recruited)
Time (min)	Replicate 1	Replicate 2	Replicate 3	Average	SD		Replicate 1	Replicate 2	Replicate 3	Average	SD		Replicate 1	Replicate 2	Replicate 3	Average	SD		Replicate 1	Replicate 2	Replicate 3	Average	SD
0.15																			63.2	71.89	67.9	67.6633	4.34983
0.25																			85.43	85.63	83.45	84.8367	1.20504
0.5													64.01	74.64	61.61	66.7533	6.93467		89.1	89.12	90.68	89.6333	0.906495
1													67.88	77.72	68.75	71.45	5.44738		90.37	91.71	94.15	92.0767	1.91649
2	9.37	16.05	12.65	12.69	3.34018		4.88	11.23	12.73	9.61333	4.16723		71.4	80.7	73.16	75.0867	4.9403		91.51	94.63	97.62	94.5867	3.05523
5	12.98	16.07	14.75	14.6	1.55045		7.5	21.67	11.57	13.58	7.2957		82.6	86.94	80.81	83.45	3.15216		95.53	96.68	97.6	96.6033	1.03713
15	15.62	18.05	16.62	16.7633	1.22132		11.65	12.81	32.57	19.01	11.7576		88.5	95.56	89.27	91.11	3.873		97.6		98.08	97.84	0.339411
30	30.71	34.12	26.06	30.2967	4.04587		21.54	27.94	43.44	30.9733	11.2607		89.54	95.5	96.4	93.8133	3.72807
60	32.89	31.64	38.97	34.5	3.92126		28.98	25.34	52.53	35.6167	14.76
100	48.91	50.64	48.59	49.38	1.10286		56.58	47.12	55.48	53.06	5.17351
Figure 3- figure supplemental 1I
	PMA1
	-eIF4A, -Ded1 (% mRNA recruited)					-eIF4A, +Ded1 (% mRNA recruited)					+eIF4A, -Ded1 (% mRNA recruited)					+eIF4A, +Ded1 (% mRNA recruited)
Time (min)	Replicate 1	Replicate 2	Average	SD		Replicate 1	Replicate 2	Average	SD		Replicate 1	Replicate 2	Average	SD		Replicate 1	Replicate 2	Average	SD
0.5																46.8	44.5	45.65	1.62635
1																69.7	69.73	69.715	0.0212132
2	11.6	9.84	10.72	1.24451		5.6	5.98	5.79	0.268701		26.05	24.48	25.265	1.11016		80.62	71.4	76.01	6.51952
5	11.5	4.03	7.765	5.28209		6.39	8.83	7.61	1.72534		23.76	28.3	26.03	3.21026		81.43	68.86	75.145	8.88833
15	6.77	4.17	5.47	1.83848		14	4.44	9.22	6.75994		36.3	33.87	35.085	1.71827		87.78	84.15	85.965	2.5668
30	7.28	4.55	5.915	1.9304		7.7	9.08	8.39	0.975807		37.33	34.72	36.025	1.84555		86.23	91.21	88.72	3.52139
60	4.04	3.29	3.665	0.53033		10.1	6.01	8.055	2.89207		35.87	28.55	32.21	5.17602		86.47	90.75	88.61	3.02642
120	7.1	4.14	5.62	2.09304		9.11		9.11			34.07	34.31	34.19	0.169706
Figure 3- figure supplemental 1J
	FET3
	-eIF4A, -Ded1 (% mRNA recruited)					-eIF4A, +Ded1 (% mRNA recruited)					+eIF4A, -Ded1 (% mRNA recruited)					+eIF4A, +Ded1 (% mRNA recruited)
Time (min)	Replicate 1	Replicate 2	Average	SD		Replicate 1	Replicate 2	Average	SD		Replicate 1	Replicate 2	Average	SD		Replicate 1	Replicate 2	Average	SD
2		2.22	2.22				4.86	4.86			12.02	11.77	11.895	0.176777		49.76	43.88	46.82	4.15779
5	2.6	4.35	3.475	1.23744		4.52	6.42	5.47	1.3435		20.45	23.95	22.2	2.47487		69.05	50.51	59.78	13.1098
15	3.15	3.21	3.18	0.0424264		5.42	5.28	5.35	0.0989949		38.88	31.98	35.43	4.87904		79.62	58.36	68.99	15.0331
30	3.74	2.92	3.33	0.579828		5.56	6.83	6.195	0.898026		58.65	50.59	54.62	5.69928		86.64	72.39	79.515	10.0763
60	4.32	3.12	3.72	0.848528		4.61	5.92	5.265	0.92631		66.97	64.37	65.67	1.83848		91.28	80.33	85.805	7.74282
120	4.24	3.03	3.635	0.855599		5.56	7.08	6.32	1.0748		77.39	75.56	76.475	1.29401		87.01	81.41	84.21	3.9598
180	5.41	3.33	4.37	1.47078		5.8	6.97	6.385	0.827315		79.83	81.27	80.55	1.01823
