# Supplementary material for: Yeast Ded1 promotes 48S translation pre-initiation complex assembly in an mRNA-specific and eIF4F-dependent manner
Source: eLife. 2018 Oct 3;7:e38892. doi: 10.7554/eLife.38892 (PMC6181565; doi:10.7554/eLife.38892)
Supplement: Figure 3—source data 1. [file elife-38892-fig3-data1.xlsx]

## Sheet: Sheet1
Figure 3- Source File
	RPL41A - Rates (min-1)				HOR7 - Rates (min-1)				OST3 - Rates (min-1)				SFT2- Rates (min-1)
	Replicate 1	Replicate 2	Replicate 3		Replicate 1	Replicate 2	Replicate 3		Replicate 1	Replicate 2	Replicate 3		Replicate 1	Replicate 2	Replicate 3
-eIF4E∙eIF4G,-Ded1	0.031877	0.092378	0.031877		0.097554	0.19842	0.082639
-eIF4E∙eIF4G,+Ded1	0.044947	0.079897	0.044727		0.14494	0.16465	0.20294		0.2001	0.29203	0.12126		0.14245	0.16738	0.25779
+eIF4E∙eIF4G,-Ded1	1.59709	1.70089	1.58185		1.55835	1.57253	1.12594		0.38503	0.31393	0.37276		0.40542	0.46179	0.51105
+eIF4E∙eIF4G,+Ded1	4.17529	4.22024	3.24939		3.71461	4.20745	3.84658		1.82285	2.05201	2.2356		3.42688	3.28423	3.53532
	SFT2-M- Rates (min-1)				-SL - Rates (min-1)				CD-8.1 - Rates (min-1)				CP-8.1 - Rates (min-1)
	Replicate 1	Replicate 2	Replicate 3		Replicate 1	Replicate 2	Replicate 3		Replicate 1	Replicate 2	Replicate 3		Replicate 1	Replicate 2	Replicate 3
-eIF4E∙eIF4G,-Ded1					0.31868	0.22325	0.39111
-eIF4E∙eIF4G,+Ded1	0.21991	0.15929	0.25771		0.2713	0.15649	0.26046		0.08372	0.10164	0.068004
+eIF4E∙eIF4G,-Ded1	1.1784	1.0195	1.3084		2.18347	1.82831	2.36124		0.10439	0.093849	0.1161		0.39857	0.38661	0.34925
+eIF4E∙eIF4G,+Ded1	3.181	3.54818	3.30595		7.42456	6.39382	7.46952		1.93948	2.15104	1.70788		1.0261	1.3628	1.4167
