# Supplementary material for: Yeast Ded1 promotes 48S translation pre-initiation complex assembly in an mRNA-specific and eIF4F-dependent manner
Source: eLife. 2018 Oct 3;7:e38892. doi: 10.7554/eLife.38892 (PMC6181565; doi:10.7554/eLife.38892)
Supplement: Figure 4—figure supplement 1—source data 1. [file elife-38892-fig4-figsupp1-data1.xlsx]

## Sheet: Sheet1
Figure 4- figure supplemental 1- Source File
Figure 4- figure supplemental 1B
	SFT2
	WT-eIF4E∙eIF4G - Rates (min-1)						eIF4E∙eIF4G-∆RNA3 - Rates (min-1)						eIF4E∙eIF4G-∆RNA2 - Rates (min-1)
Ded1 (nM)	Replicate 1	Replicate 2	Replicate 3	Average	SD		Replicate 1	Replicate 2	Replicate 3	Average	SD		Replicate 1	Replicate 2	Replicate 3	Average	SD
0	0.39028	0.48381	0.44906	0.44105	0.0472767		0.33827	0.32325	0.37892	0.346813	0.0288015		0.215	0.34079	0.17142	0.242403	0.0879475
25	0.59991	0.79903	0.80736	0.735433	0.117441
50	0.68543	0.87736	0.9589	0.840563	0.140399		0.65644	0.61261	0.48	0.583017	0.0918673		0.21277	0.46889	0.59941	0.427023	0.196691
100	0.82582	1.1849	1.4328	1.14784	0.305182		1.1657	0.98402	0.80411	0.98461	0.180796		0.49871	0.77265	0.74684	0.672733	0.15126
250	2.1267	2.0348	2.0777	2.07973	0.0459837		1.5289	1.5023	1.69	1.57373	0.101564		1.0913	1.1087	1.0684	1.08947	0.0202125
500	2.4461	2.7918	2.4623	2.56673	0.195082		2.2419	2.395	2.2733	2.3034	0.0808666		0.94031	1.284	1.2151	1.14647	0.181833
750	2.8912	2.9522	2.8185	2.8873	0.0669353		2.2599	2.3061	2.241	2.269	0.0334904		0.98186	1.1552	1.3737	1.17025	0.196353
1000	2.5322	2.728		2.6301	0.138452		2.3339	2.4052	1.9982	2.24577	0.217343
Figure 4- figure supplemental 1C
	RPL41A -Ded1 Rates (min-1)						RPL41A +Ded1 (250 nM) Rates (min-1)							RPL41A +Ded1 (500 nM) Rates (min-1)
eIF4E∙eIF4G-∆RNA3	Replicate 1	Replicate 2	Replicate 3	Average	SD		Replicate 1	Replicate 2	Replicate 3	Average	SD		Replicate 1
0	0.067981	0.12936	0.08684	0.094727	0.0314404		0.036876	0.061257	0.075506	0.0578797	0.0195352		0.059704
10	0.38345	0.26189	0.35857	0.334637	0.0642169		0.3874	0.25238	0.49715	0.378977	0.122602		0.26534
25	0.41571	0.53392	0.5747	0.50811	0.0825777		0.5267	0.58541	0.69974	0.60395	0.0879972		0.47978
50	0.62116	0.70898	0.64066	0.656933	0.0461162		0.92319	0.73265	0.91764	0.857827	0.108442		1.1261
100	0.72632	0.90988	0.79036	0.808853	0.0931669		1.3844	1.0437	1.2751	1.2344	0.173958		1.4485
150			0.94651	0.94651					1.4839	1.4839
250	0.95363	1.0346	0.93816	0.975463	0.0517947		1.2783	1.1038	1.2865	1.22287	0.103196		1.3458
Figure 4- figure supplemental 1D
	HOR7 WT-Ded1 - Rates (min-1)						HOR7 Ded1-∆CTD - Rates (min-1)
Ded1 (nM)	Replicate 1	Replicate 2	Replicate 3	Average	SD		Replicate 1	Replicate 2	Replicate 3	Average	SD
0	1.1859	1.4749	1.2103	1.29037	0.160276		1.0593	0.93522	0.78677	0.927097	0.136446
10	1.3695			1.3695
25	1.5323	1.6141		1.5732	0.0578413
50	1.6326	1.787	1.4	1.60653	0.194812		1.217			1.217
100	1.9311	2.2281	1.881	2.0134	0.187615		1.26	0.66588	0.68876	0.871547	0.336605
250	2.5152	2.634	2.2125	2.4539	0.217333		1.2574	0.98157	0.6985	0.979157	0.279458
500	2.7239	2.828	2.0328	2.52823	0.432203		1.5337	1.4476	1.05	1.34377	0.258026
750	2.8982	2.8782	2.1754	2.6506	0.411657
1000	2.6562	2.8106	2.3316	2.59947	0.244488		1.3748	0.95436	1.4444	1.25785	0.265127
2000								0.95021	1.3865	1.16836	0.308504
	RPL41A - Rates (min-1)						RPL41A Ded1-∆CTD - Rates (min-1)
Ded1 (nM)	Replicate 1	Replicate 2	Replicate 3	Average	SD		Replicate 1	Replicate 2	Replicate 3	Average	SD
0	0.8529	1.0458	1.0458	0.9815	0.111371		1.0375	0.7402	1.0876	0.9551	0.187787
10	0.92904	1.2776	1.3002	1.16895	0.208072
25	1.2123	1.5621	1.4006	1.39167	0.175071			1.3704		1.3704
50	1.6208	1.879	1.7953	1.76503	0.131734		1.2743	1.1836	1.1691	1.209	0.0570143
100	1.7994	2.6822	2.3713	2.2843	0.447784		1.4501	1.1404	1.3093	1.29993	0.155062
250	1.9947	2.4882	2.4234	2.3021	0.268181		1.4519	1.0009	1.0669	1.17323	0.243578
500	2.1884			2.1884			1.16	1.281	0.91914	1.12005	0.184209
750	2.2791			2.2791			1.2872			1.2872
1000							1.402		0.90022	1.15111	0.354812
Figure 4- figure supplemental 1E
	Rates -Ded1 (min-1)				+Ded1 (min-1)				eIF4E∙eIF4G-∆RNA3 + WT-Ded1 (min-1)				WT-eIF4E∙eIF4G + Ded1-∆CTD (min-1)				eIF4E∙eIF4G-∆RNA3 + Ded1-∆CTD (min-1)
	Replicate 1	Replicate 2	Replicate 3		Replicate 1	Replicate 2	Replicate 3		Replicate 1	Replicate 2	Replicate 3		Replicate 1	Replicate 2	Replicate 3		Replicate 1	Replicate 2
RPL41A	1.59709	1.70089	1.58185		4.17529	4.22024	3.24939		1.60022	1.30834	1.59171		1.281	1.16	0.91914		0.857895	0.86032
CD-8.1	0.10439	0.093849	0.1161		1.93948	2.15104	1.70788		1.53698	1.83107	1.69515		1.3743	1.45184	1.71678		1.595	1.4914
CP-8.1	0.39857	0.38661	0.34925		1.2261	1.3628	1.4167		0.80315	0.75292	0.76266		0.63616	0.66625	0.6795		0.697565	0.59057
