# Supplementary material for: Yeast Ded1 promotes 48S translation pre-initiation complex assembly in an mRNA-specific and eIF4F-dependent manner
Source: eLife. 2018 Oct 3;7:e38892. doi: 10.7554/eLife.38892 (PMC6181565; doi:10.7554/eLife.38892)
Supplement: Figure 4—figure supplement 2—source data 1. [file elife-38892-fig4-figsupp2-data1.xlsx]

## Sheet: Sheet1
Figure 4- figure supplemental 2- Source File
Figure 4- figure supplemental 2A
	K1/2 eIF4E∙eIF4G-Ded1 (nM)				K1/2eIF4E∙eIF4G +Ded1 (nM)
	Replicate 1	Replicate 2	Replicate 3		Replicate 1	Replicate 2	Replicate 3
RPL41A	29.579	28.374	32.874		10.975	10.335	15.408
HOR7	29.907	40.624	32.994		17.025	21.592	15.454
OST3	71.522	67.082	60.807		27.681	34.281	29.887
SFT2	40.142	29.783	48.921		16.619	16.696	10.159
SFT2-M	36.402	30.864	37.75		14.722	18.539	14.404
-SL	2.5122	4.2288	2.8686		16.672	11.132	18.42
CD-8.1					41.277	35.368	41.305
CP-8.1	7.1148	7.9967	8.9965		31.104	26.318	22.319
Figure 4- figure supplemental 2B
	K1/2 eIF4A-Ded1 (𝛍M)				K1/2 eIF4A+Ded1 (𝛍M)
	Replicate 1	Replicate 2	Replicate 3		Replicate 1	Replicate 2	Replicate 3
RPL41A	1.8116	2.6428	1.7066		1.3398	2.8771	1.8736
HOR7	1.2168	1.4728	1.2256		1.0196	0.94399	0.81916
OST3	4.692	4.649	4.8841		0.67	0.519	0.59531
SFT2	5.7324	7.1058	4.9997		1.7309	1.988	1.4908
SFT2-M	6.2417	7.6841	6.7861		1.8133	1.5726	1.5107
-SL	0.31939	0.27275	0.22666		0.65053	0.67903	0.70591
CD-8.1	0.67822	1.0824	0.63799		2.0977	2.358	1.7521
CP-8.1	1.4304	1.2815	1.0191		1.3371	1.863	2.2533
