# Supplementary material for: Yeast Ded1 promotes 48S translation pre-initiation complex assembly in an mRNA-specific and eIF4F-dependent manner
Source: eLife. 2018 Oct 3;7:e38892. doi: 10.7554/eLife.38892 (PMC6181565; doi:10.7554/eLife.38892)
Supplement: Figure 4—source data 1. [file elife-38892-fig4-data1.xlsx]

## Sheet: Sheet1
Figure 4- Source File
Figure 4A
	eIF4E∙eIF4G-∆RNA3 -Ded1 (min-1)				WT eIF4E∙eIF4G -Ded1 (min-1)				eIF4E∙eIF4G-∆RNA3 +Ded1 (min-1)				WT eIF4E∙eIF4G +Ded1 (min-1)
	Replicate 1	Replicate 2	Replicate 3		Replicate 1	Replicate 2	Replicate 3		Replicate 1	Replicate 2	Replicate 3		Replicate 1	Replicate 2	Replicate 3
RPL41A	1.0632	1.21639	1.03902		1.59709	1.70089	1.58185		1.60022	1.30834	1.59171		4.17529	4.22024	3.24939
HOR7	1.0147	1.31848	1.13745		1.55835	1.57253	1.12594		1.50825	1.71278	1.75237		3.71461	4.20745	3.84658
SFT2	0.4173	0.42596	0.50829		0.40542	0.46179	0.51105		2.16061	2.3515	2.5333		3.42688	3.28423	3.53532
SFT2-M	0.99457	1.21755	1.1774		1.1784	1.0195	1.3084		2.06541	1.88388	2.07869		3.181	3.54818	3.30595
-SL	2.43818	2.41624	2.49916		2.18347	1.82831	2.36124		6.18772	6.41569	5.93115		7.42456	6.39382	7.46952
CD-8.1	0.11007	0.13592	0.11388		0.10439	0.093849	0.1161		1.53698	1.83107	1.69515		1.93948	2.15104	1.70788
CP-8.1	0.40761	0.45068	0.48499		0.39857	0.38661	0.34925		0.80315	0.75292	0.76266		1.2261	1.3628	1.4167
Figure 4B
	WT eIF4E∙eIF4G- Fold-change-rates (+/-Ded1)				eIF4E∙eIF4G-∆RNA3- Fold change-rates (+/-Ded1)
	Replicate 1	Replicate 2	Replicate 3		Replicate 1	Replicate 2	Replicate 3
RPL41A	2.61432	2.4812	2.05417		1.50509	1.07559	1.53193
HOR7	2.38369	2.67559	3.41631		1.4864	1.29905	1.54061
SFT2	8.45267	7.11196	6.91776		5.17759	5.52047	4.98397
SFT2-M	2.69942	3.48031	2.52671		2.07669	1.54727	1.76549
-SL	3.40035	3.49712	3.16339		2.53784	2.65524	2.37326
CD-8.1	18.5792	22.9202	14.7104		13.9637	13.4717	14.8854
CP-8.1	3.07625	3.525	4.05641		1.97039	1.67063	1.57253
Figure 4C
	K1/2eIF4E∙eIF4G-∆RNA3 -Ded1(nM)				K1/2WT eIF4E∙eIF4G -Ded1(nM)				K1/2eIF4E∙eIF4G-∆RNA3 +Ded1(nM)				K1/2WT eIF4E∙eIF4G +Ded1(nM)
	Replicate 1	Replicate 2	Replicate 3		Replicate 1	Replicate 2	Replicate 3		Replicate 1	Replicate 2	Replicate 3		Replicate 1	Replicate 2	Replicate 3
RPL41A	43.945	42.597	28.588		29.579	28.374	32.874		36.942	36.72	32.545		10.975	10.335	15.408
HOR7	41.759	32.307	57.106		29.907	40.624	32.994		50.012	41.563	31.237		17.025	21.592	15.454
SFT2	48.513	47.838	63.935		40.142	29.783	48.921		38.51	27.657	34.777		16.619	16.696	10.159
SFT2-M	34.793	21.164	32.514		36.402	30.864	37.75		85.368	79.844	80.37		14.722	18.539	14.404
-SL	3.8735	6.1184	3.967		2.5122	4.2288	2.8686		65.015	59.049	55.623		16.672	11.132	18.42
CD-8.1									81.308	65.506	76.376		41.277	35.368	41.305
CP-8.1	22.342	18.897	19.671		7.1148	7.9967	8.9965		71.569	89.342	60.177		31.104	26.318	22.319
Figure 4D
	Rates -Ded1 (min-1)				Ded1-∆CTD (min-1)				WT Ded1 (min-1)
	Replicate 1	Replicate 2	Replicate 3		Replicate 1	Replicate 2	Replicate 3		Replicate 1	Replicate 2	Replicate 3
RPL41A	0.8529	0.95259	1.0458		1.281	1.16	0.91914		2.36105	2.98996	2.9057
HOR7	1.1859	1.4749	1.2103		1.3748	0.95436	1.3444		3.0513	3.1019	2.3746
SFT2	0.39028	0.48381	0.44906		2.23727	2.58156	2.79584		3.39211	3.62519	3.4397
SFT2-M	0.84539	0.82745	0.97004		1.8646	2.15272	2.34621		3.44487	3.43367	3.36454
-SL	1.933	1.7071	2.0758		5.84	6.1831	6.0635		6.4476	6.0789	6.8669
CD-8.1	0.093177	0.12173	0.12689		1.3743	1.45184	1.71678		2.01949	1.94878	1.75307
CP-8.1	0.18582	0.2827	0.27117		0.63616	0.66625	0.6795		1.07389	1.45772	1.29953
Figure 4E
	WT Ded1- Fold change-rates (+/-Ded1)				Ded1-∆CTD- Fold change-rates (+/-Ded1)
	Replicate 1	Replicate 2	Replicate 3		Replicate 1	Replicate 2	Replicate 3
RPL41A	2.76826	3.13877	2.77845		1.73061	1.11807	0.864503
HOR7	2.57298	2.10313	1.96199		1.29784	1.02047	1.38927
SFT2	8.69148	7.493	7.65978		5.73247	5.3359	6.22598
SFT2-M	4.07489	4.1497	3.46845		2.49973	2.72631	2.84596
-SL	3.33554	3.56095	3.30807		2.41432	3.01909	3.50633
CD-8.1	21.6737	16.009	13.8157		16.206	11.8267	17.2376
CP-8.1	5.77919	5.15642	4.79231		1.94651	1.9746	2.265
Figure 4F
	K1/2Ded1-∆CTD (nM)				K1/2WT Ded1 (nM)
	Replicate 1	Replicate 2	Replicate 3		Replicate 1	Replicate 2	Replicate 3
RPL41A					58.705	49.349	64.725
HOR7					129.1	120.4	97.067
SFT2	1207.3	1230.4	1254.1		239.88	251.34	216.9
SFT2-M	233.39	237.15	311.8		119.93	126.14	112.14
-SL	275.16	189.12	181.71		31.671	37.174	29.228
CD-8.1	623.56	628.29	640.15		413.73	470.23	426.52
CP-8.1	212.52	213.45	240.72		285.11	207.16	262.34
