# Supplementary material for: Yeast Ded1 promotes 48S translation pre-initiation complex assembly in an mRNA-specific and eIF4F-dependent manner
Source: eLife. 2018 Oct 3;7:e38892. doi: 10.7554/eLife.38892 (PMC6181565; doi:10.7554/eLife.38892)
Supplement: Figure 5—source data 1. [file elife-38892-fig5-data1.xlsx]

## Sheet: Sheet1
Figure 5- Source File
Figure 5A
	eIF4E∙eIF4G-∆RNA2 -Ded1 (min-1)				WT eIF4E∙eIF4G -Ded1 (min-1)				eIF4E∙eIF4G-∆RNA2 +Ded1 (min-1)				WT eIF4E∙eIF4G +Ded1 (min-1)
	Replicate 1	Replicate 2	Replicate 3		Replicate 1	Replicate 2	Replicate 3		Replicate 1	Replicate 2	Replicate 3		Replicate 1	Replicate 2	Replicate 3
RPL41A	1.37938	1.57903	1.36326		1.59709	1.70089	1.58185		2.76588	3.45482	3.73341		4.17529	4.22024	3.24939
HOR7	1.43756	1.18963	1.28605		1.55835	1.57253	1.12594		3.10619	3.28817	3.06833		3.71461	4.20745	3.84658
SFT2	0.41763	0.4399	0.48336		0.40542	0.46179	0.51105		1.38167	1.54003	1.36912		3.42688	3.28423	3.53532
SFT2-M	1.2297	1.0608	1.035		1.1784	1.0195	1.3084		1.99401	2.09128	2.20252		3.181	3.54818	3.30595
-SL	2.38269	2.27506	2.05314		2.18347	1.82831	2.36124		7.15927	7.74146	6.83886		7.42456	6.39382	7.46952
CD-8.1	0.11955	0.13841	0.13851		0.10439	0.093849	0.1161		0.719781	0.664768	0.719187		1.93948	2.15104	1.70788
CP-8.1	0.35267	0.39221	0.34436		0.39857	0.38661	0.34925		0.75953	0.83953	0.72532		1.2261	1.3628	1.4167
Figure 5B
	WT eIF4E∙eIF4G- Fold change-rates (+/-Ded1)				eIF4E∙eIF4G-∆RNA2- Fold change-rates (+/-Ded1)
	Replicate 1	Replicate 2	Replicate 3		Replicate 1	Replicate 2	Replicate 3
RPL41A	2.61432	2.4812	2.05417		2.00517	2.18794	2.73858
HOR7	2.38369	2.67559	3.41631		2.16074	2.76401	2.38585
SFT2	8.45267	7.11196	6.91776		3.30836	3.50085	2.8325
SFT2-M	2.69942	3.48031	2.52671		1.62154	1.97142	2.12804
-SL	3.40035	3.49712	3.16339		3.0047	3.40275	3.33093
CD-8.1	18.5792	22.9202	14.7104		6.02075	4.80289	5.19231
CP-8.1	3.07625	3.525	4.05641		2.15366	2.14051	2.10628
Figure 5C
	K1/2eIF4E∙eIF4G-∆RNA2 -Ded1(nM)				K1/2WT eIF4E∙eIF4G -Ded1(nM)				K1/IeIF4E∙eIF4G-∆RNA2 +Ded1(nM)				K1/2WT eIF4E∙eIF4G +Ded1(nM)
	Replicate 1	Replicate 2	Replicate 3		Replicate 1	Replicate 2	Replicate 3		Replicate 1	Replicate 2	Replicate 3		Replicate 1	Replicate 2	Replicate 3
RPL41A	42.389	38.51	48.104		29.579	28.374	32.874		68.845	70.699	64.792		10.975	10.335	15.408
HOR7	51.338	38.819	47.408		29.907	40.624	32.994		104.6	113.15	115.71		17.025	21.592	15.454
SFT2					40.142	29.783	48.921		216.92	250.06	243.84		16.619	16.696	10.159
SFT2-M	128.73	117.9	117.64		36.402	30.864	37.75		296.61	340.2	291.54		14.722	18.539	14.404
-SL	10.525	9.777	15.741		2.5122	4.2288	2.8686		215.14	222.04	227.48		16.672	11.132	18.42
CD-8.1									133.86	114.59	96.187		41.277	35.368	41.305
CP-8.1	35.822	54.31	51.154		7.1148	7.9967	8.9965		205.97	214.1	172.61		31.104	26.318	22.319
