# Supplementary material for: Yeast Ded1 promotes 48S translation pre-initiation complex assembly in an mRNA-specific and eIF4F-dependent manner
Source: eLife. 2018 Oct 3;7:e38892. doi: 10.7554/eLife.38892 (PMC6181565; doi:10.7554/eLife.38892)
Supplement: Figure 6—source data 1. [file elife-38892-fig6-data1.xlsx]

## Sheet: Sheet1
Figure 6- Source File
Figure 6A
	Rates -Ded1 (min-1)				Ded1-∆NTD (min-1)				WT Ded1 (min-1)
	Replicate 1	Replicate 2	Replicate 3		Replicate 1	Replicate 2	Replicate 3		Replicate 1	Replicate 2	Replicate 3
RPL41A	0.8529	0.95259	1.0458		3.0151	3.40938	3.18061		2.36105	2.98996	2.9057
HOR7	1.1859	1.4749	1.2103		2.44622	2.7265	2.62595		3.0513	3.1019	2.3746
SFT2	0.39028	0.48381	0.44906		2.42128	2.36509	2.25473		3.39211	3.62519	3.4397
SFT2-M	0.84539	0.82745	0.97004		3.95612	3.27948	3.69599		3.44487	3.43367	3.36454
-SL	1.933	1.7071	2.0758		6.9718	7.0698	7.3903		6.4476	6.0789	6.8669
CD-8.1	0.093177	0.12173	0.12689		1.14558	1.34454	0.9509		2.01949	1.94878	1.75307
CP-8.1	0.18582	0.2827	0.27117		0.70131	0.70965	0.64095		1.07389	1.45772	1.29953
Figure 6B
	WT Ded1- Fold change-rates (+/-Ded1)				Ded1-∆NTD- Fold change-rates (+/-Ded1)
	Replicate 1	Replicate 2	Replicate 3		Replicate 1	Replicate 2	Replicate 3
RPL41A	2.76826	3.13877	2.77845		4.1406	4.32037	4.21301
HOR7	2.57298	2.10313	1.96199		2.52021	2.83505	2.7988
SFT2	8.69148	7.493	7.65978		5.84582	5.84305	5.3403
SFT2-M	4.07489	4.1497	3.46845		5.0977	3.19326	4.34781
-SL	3.33554	3.56095	3.30807		2.88222	3.45205	4.27358
CD-8.1	21.6737	16.009	13.8157		10.9309	10.9526	10.1477
CP-8.1	5.77919	5.15642	4.79231		2.14586	2.10323	2.1365
Figure 6C
	K1/2Ded1-∆NTD (nM)				K1/2WT Ded1 (nM)
	Replicate 1	Replicate 2	Replicate 3		Replicate 1	Replicate 2	Replicate 3
RPL41A	3985.1	3707.5	3911.6		58.705	49.349	64.725
HOR7	2307.6	2484	2488.2		129.1	120.4	97.067
SFT2	2986.9	2865.7	2997.4		239.88	251.34	216.9
SFT2-M	4192.8	3893.2	4222.2		119.93	126.14	112.14
-SL	698.95	656.97	674.34		31.671	37.174	29.228
CD-8.1	600.66	514.66	533.81		413.73	470.23	426.52
CP-8.1	1878.2	1796.1	1990.5		285.11	207.16	262.34
