# Supplementary figures and images for: Yeast Ded1 promotes 48S translation pre-initiation complex assembly in an mRNA-specific and eIF4F-dependent manner
Source: eLife journal article supplement (doi:10.7554/elife.38892), 2018-10-03

Figure 4 - figure supplement 2

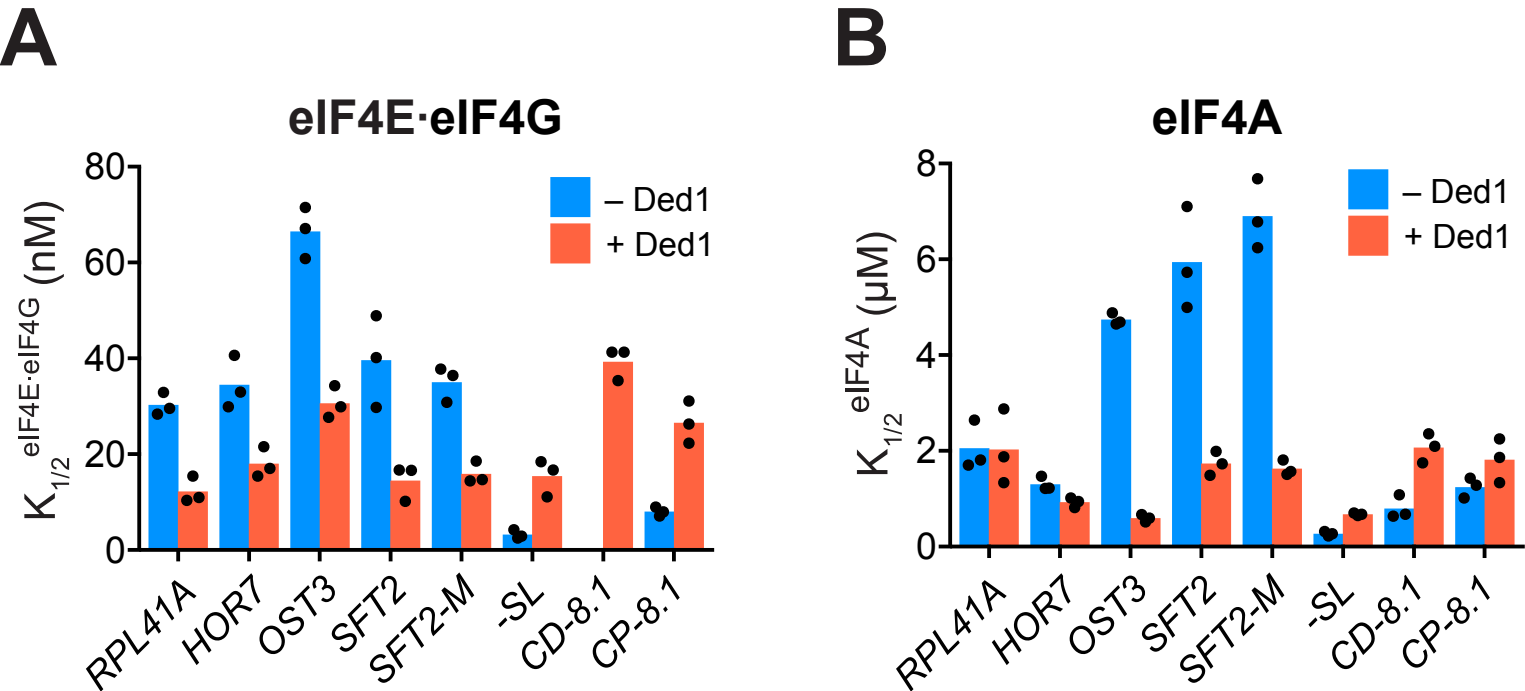

Supplement: supp [file elife-38892-supp-v1.zip]

**Figure 1- figure supplement 1**

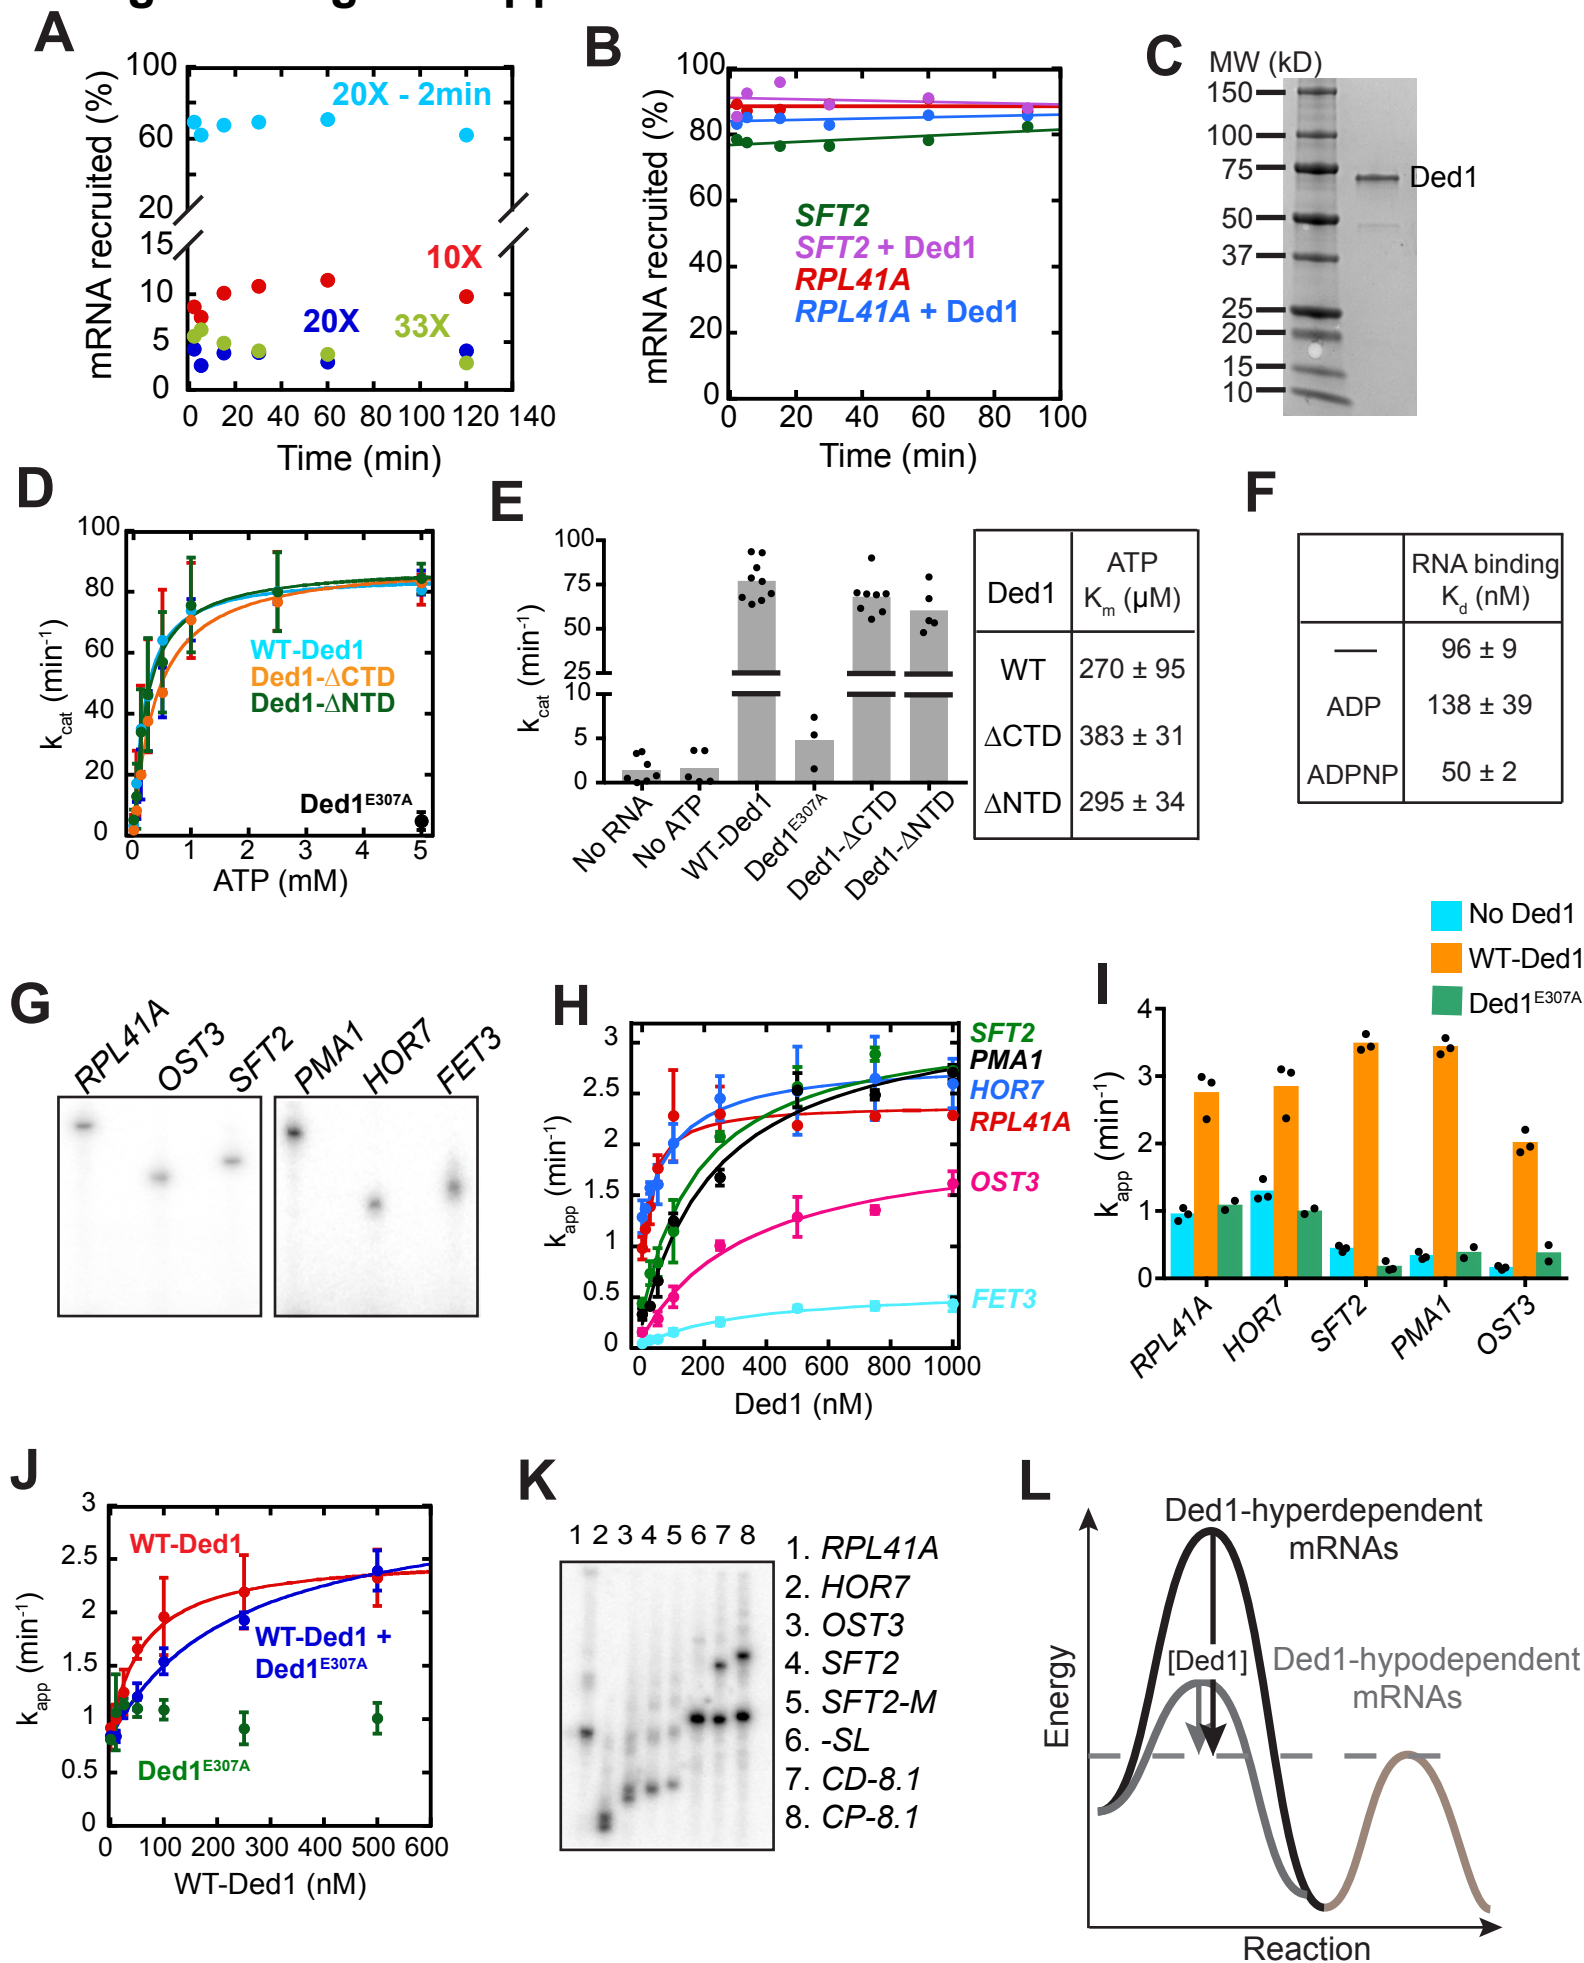

Supplement: supp [file elife-38892-supp-v1.zip]

**Figure 2- figure supplement 1**

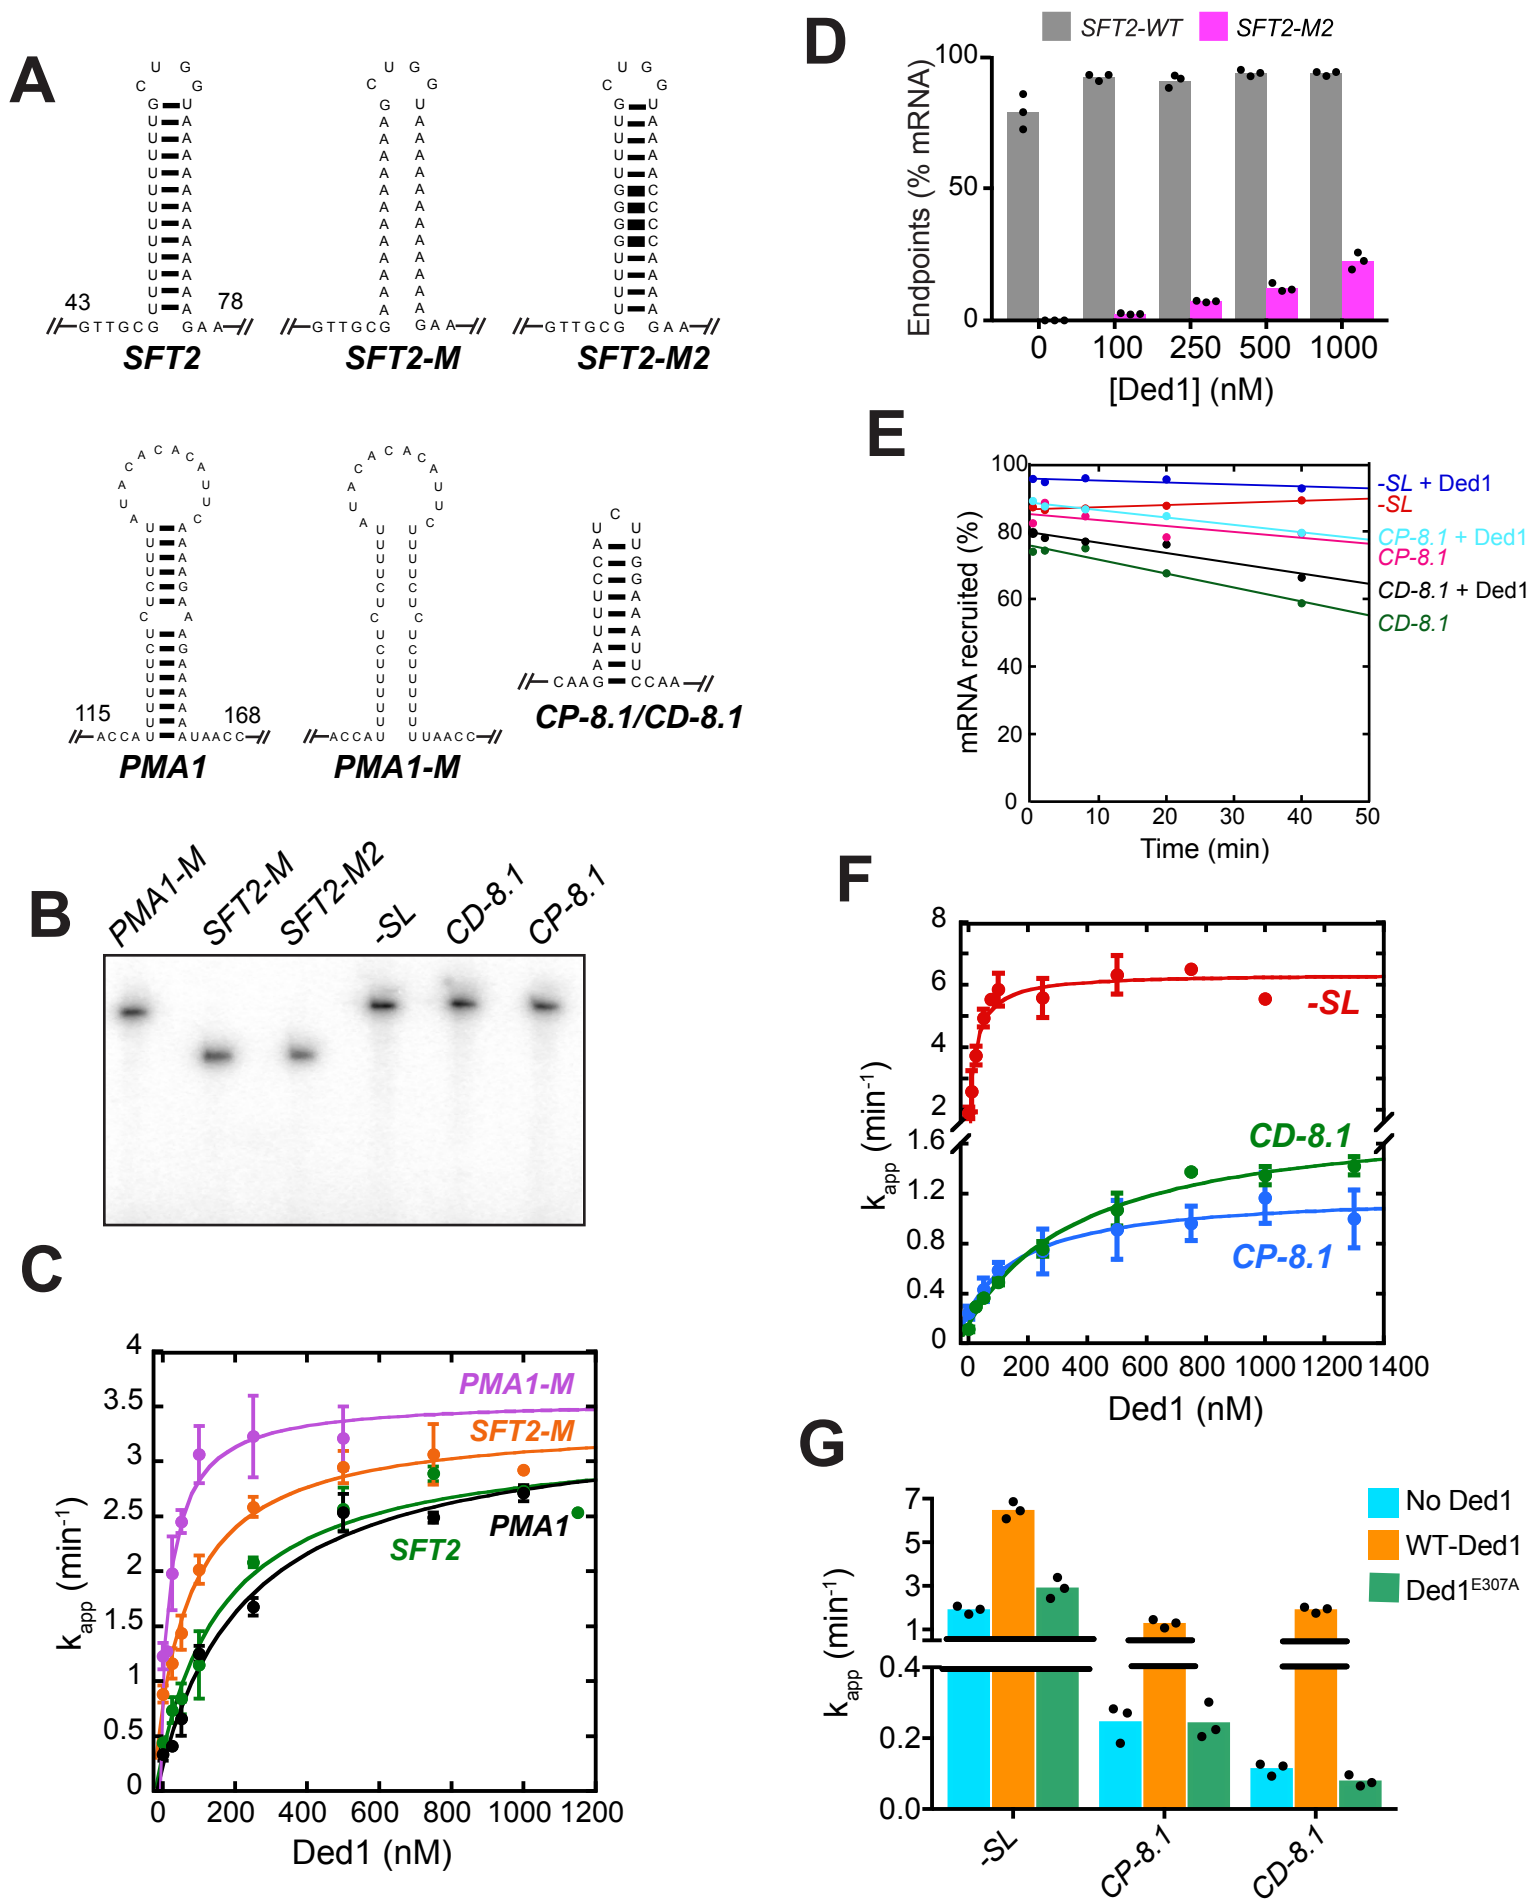

Supplement: supp [file elife-38892-supp-v1.zip]

**Figure 4 - figure supplement 1**

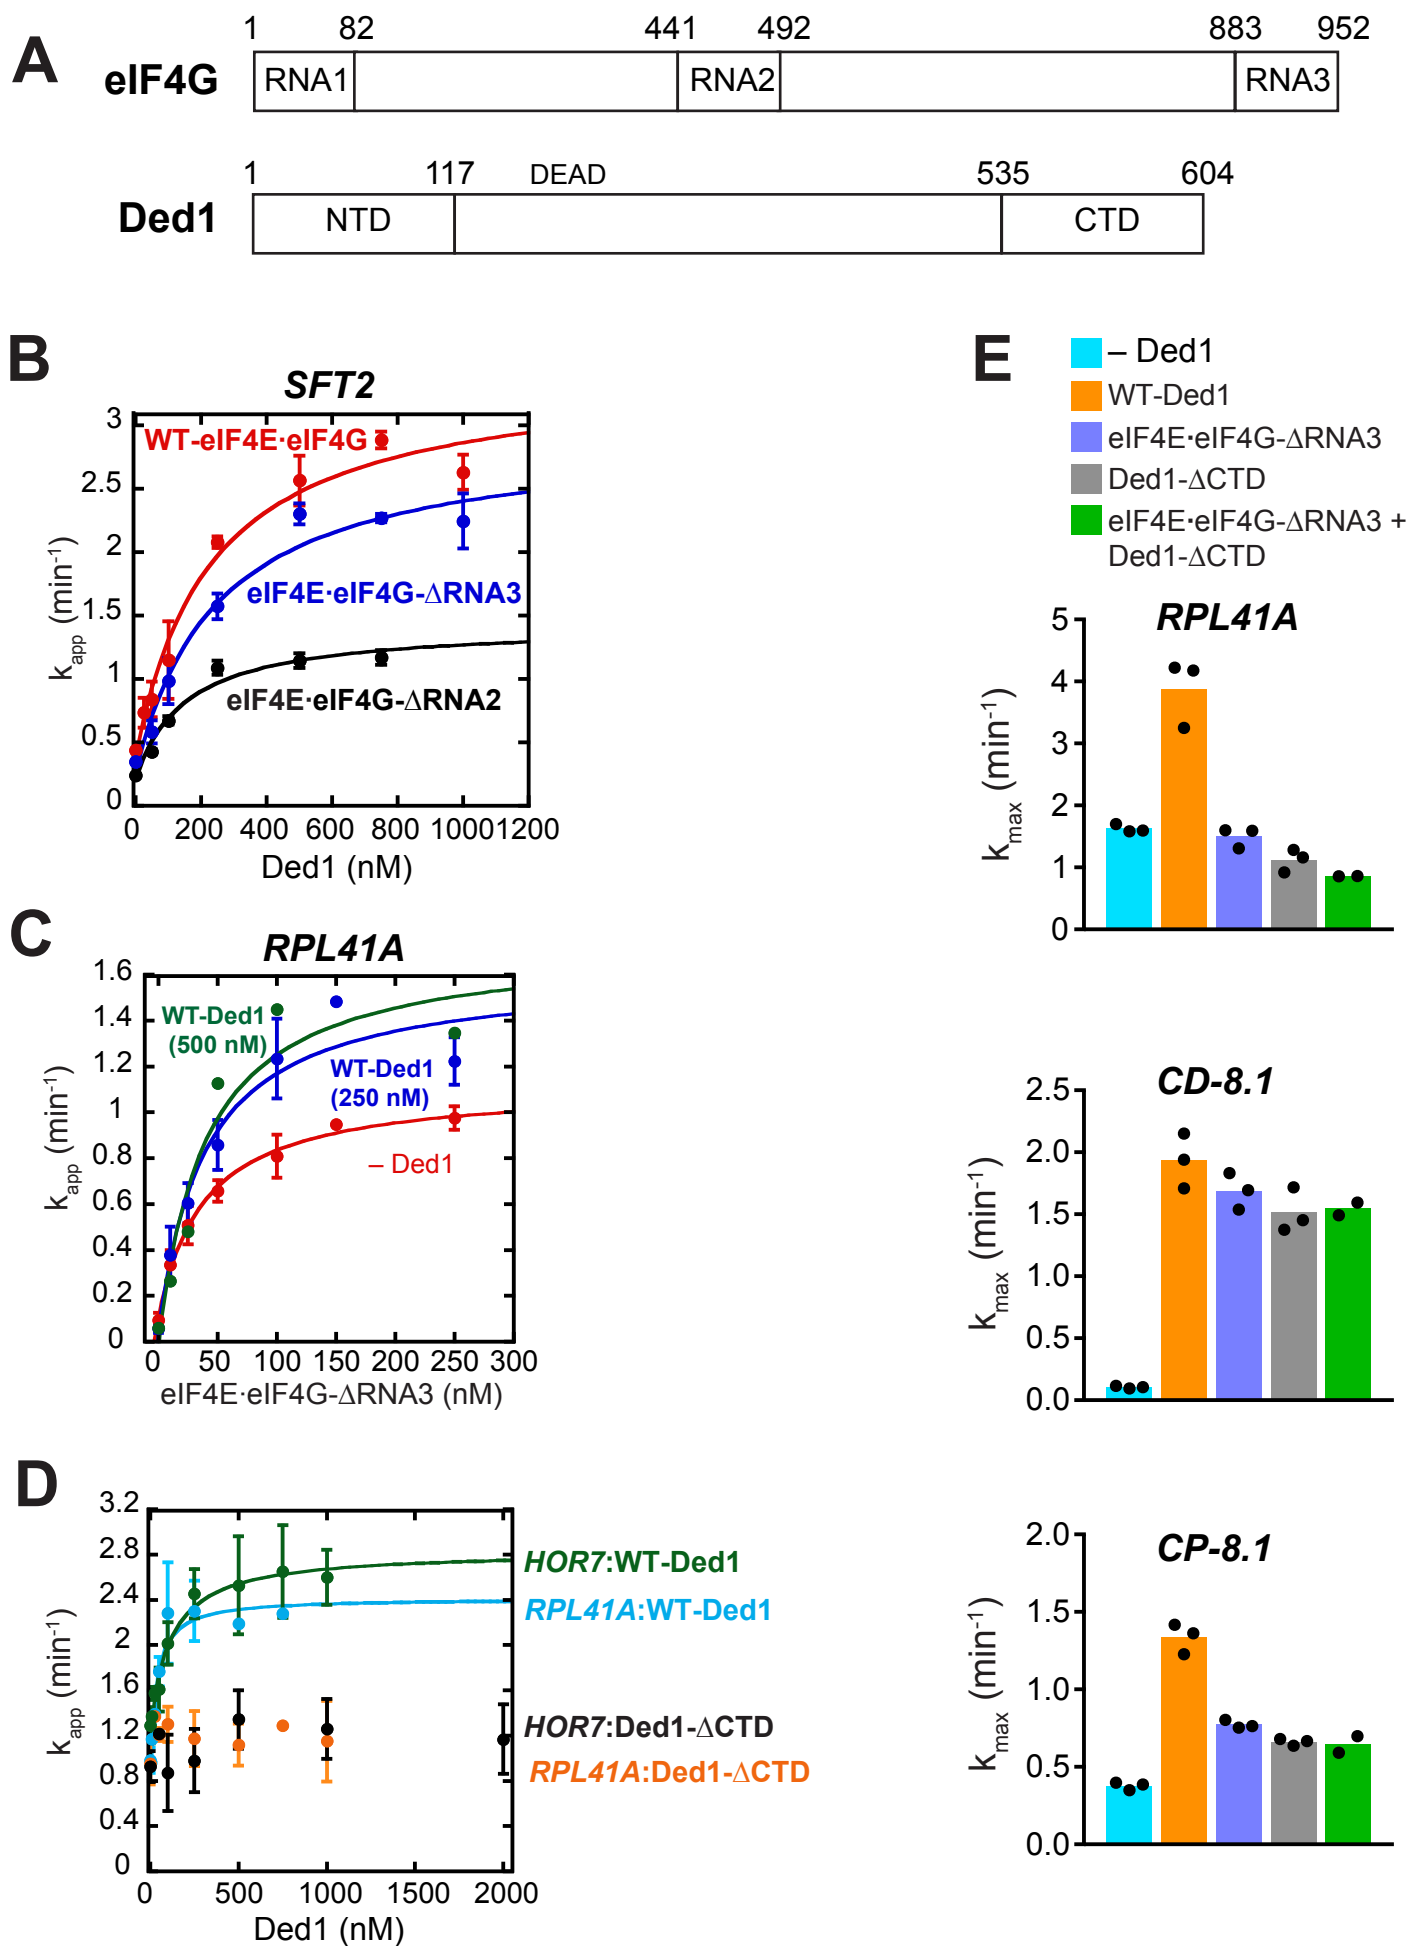

Supplement: supp [file elife-38892-supp-v1.zip]

**Figure 3 - figure supplement 1**

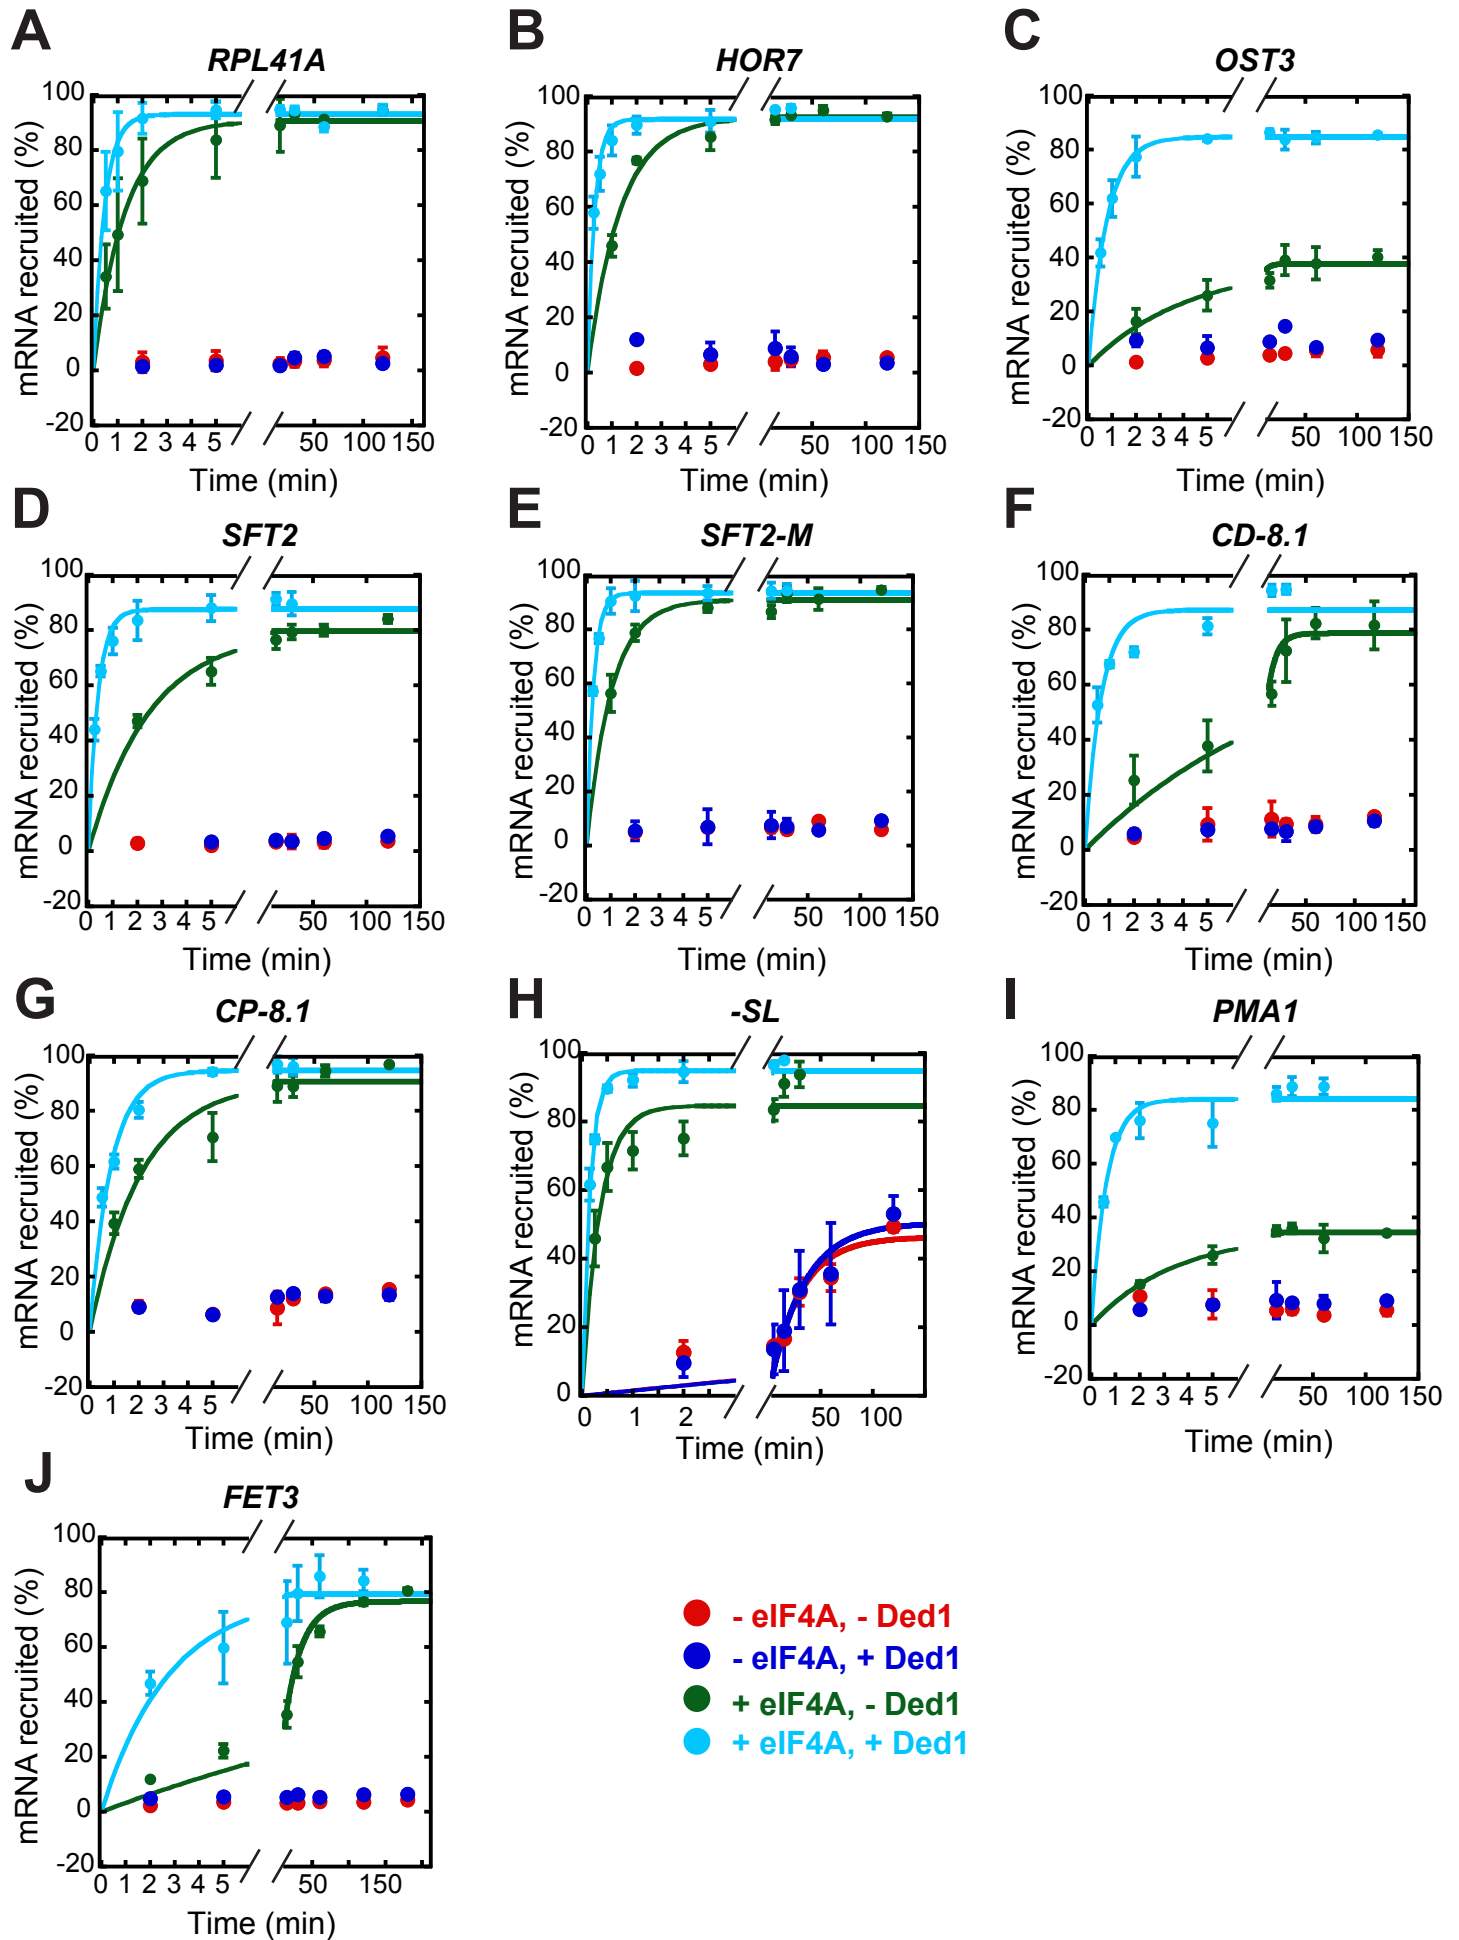

Supplement: supp [file elife-38892-supp-v1.zip]
